# Supplementary material for: BI-2536 Promotes Neuroblastoma Cell Death via Minichromosome Maintenance Complex Components 2 and 10
Source: MDPI journal article supplement (doi:10.3390/ph15010037), 2021-12-28
Supplement: s1 [file s1]

# **BI-2536 Promotes Neuroblastoma Cell Death via Minichromosome Maintenance Complex Components 2 and 10**

**Chiao-Hui Hsieh<sup>1,†</sup>, Hsiang-Ning Yeh<sup>1,†</sup>, Chen-Tsung Huang<sup>2</sup>, Wei-Hsuan Wang<sup>3</sup>, Wen-Ming Hsu<sup>4</sup>, Hsuan-Cheng Huang<sup>5,\*</sup>, Hsueh-Fen Juan<sup>1,2,3,6,\*</sup>**

<sup>1</sup>Department of Life Science, National Taiwan University, Taipei 10617, Taiwan

<sup>2</sup>Graduate Institute of Biomedical Electronics and Bioinformatics, National Taiwan University, Taipei 10617, Taiwan

<sup>3</sup>Genome and Systems Biology Degree Program, National Taiwan University and Academia Sinica, Taipei 11529, Taiwan

<sup>4</sup>Department of Surgery, National Taiwan University Hospital and National Taiwan University College of Medicine, Taipei, 10017, Taiwan

<sup>5</sup>Institute of Biomedical Informatics, Center for Systems and Synthetic Biology, National Yang Ming Chiao Tung University, Taipei 11221, Taiwan

<sup>6</sup>Center for Computational and Systems Biology, National Taiwan University, Taipei 10617, Taiwan

<sup>†</sup>Authors contributed equally to this work and share first authorship.

\*Correspondence: Hsuan-Cheng Huang (hsuancheng@nycu.edu.tw); Hsueh-Fen Juan (yukijuan@ntu.edu.tw)

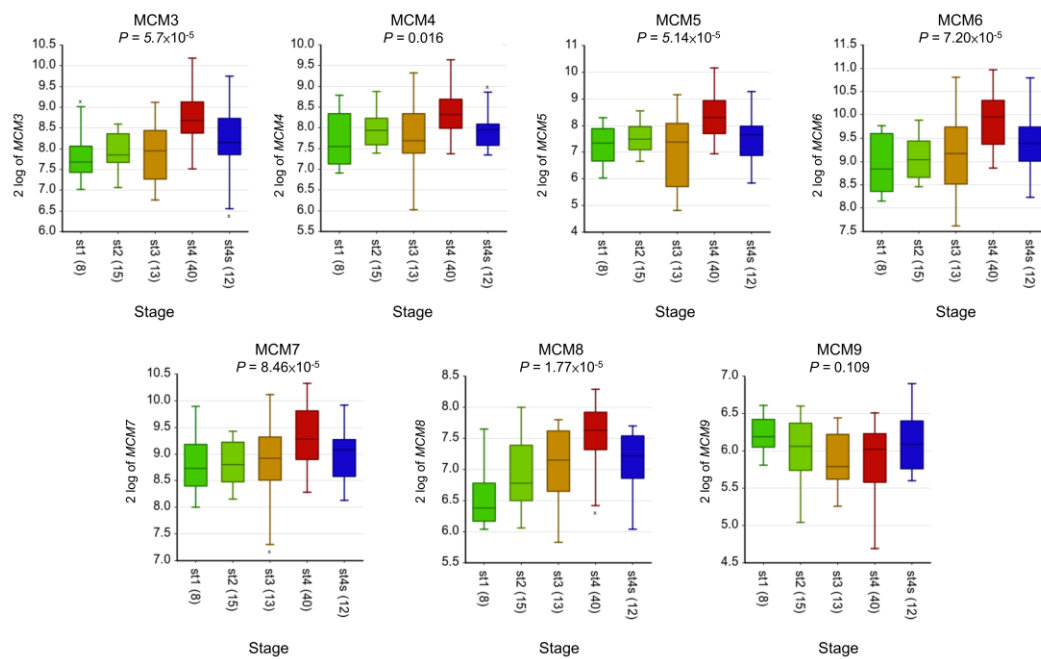

**Figure S1. MCM member gene expression across INSS stages in the Vesteeeg-88 database**

Box-plots of MCM3-9 expression in each INSS stage. The expression increases with the stage development, despite the stage 4S, is relatively low (generally better prognosis for this stage of disease). The x-axis represents the INSS stage with patient numbers shown in parentheses.

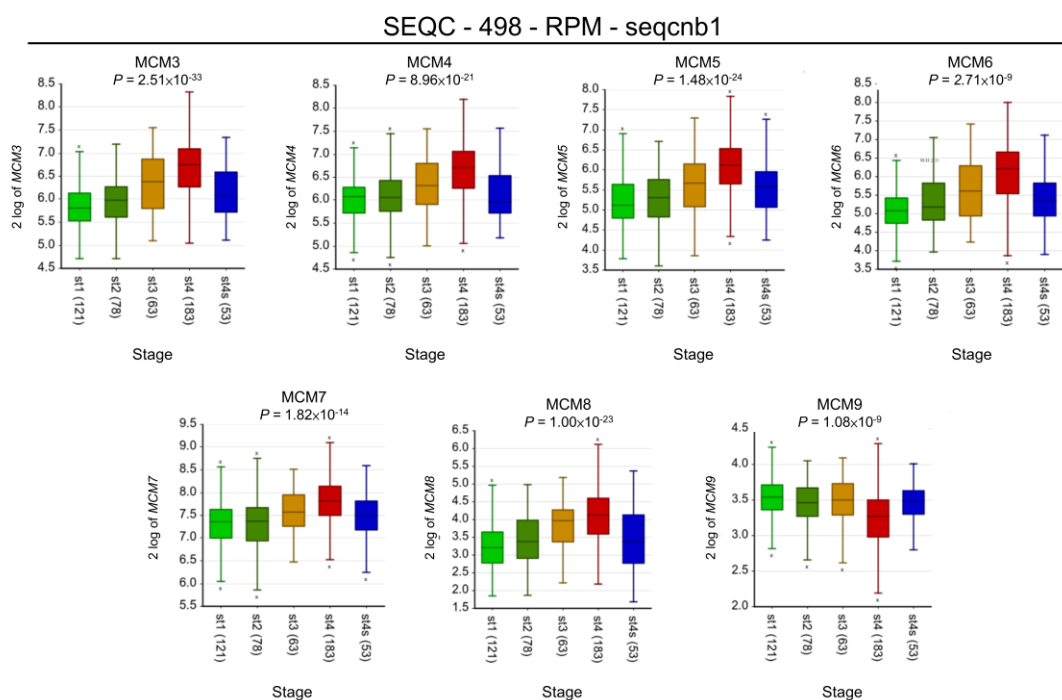

**Figure S2. MCM member gene expression across INSS stages in the SEQC-498 database**

Box-plots of MCM3-9 expression in each INSS stage. The expression increases with the stage development, despite the stage 4S is relatively low (generally better prognosis for this stage of disease). The x-axis represents the INSS stage with patient numbers shown in parentheses.

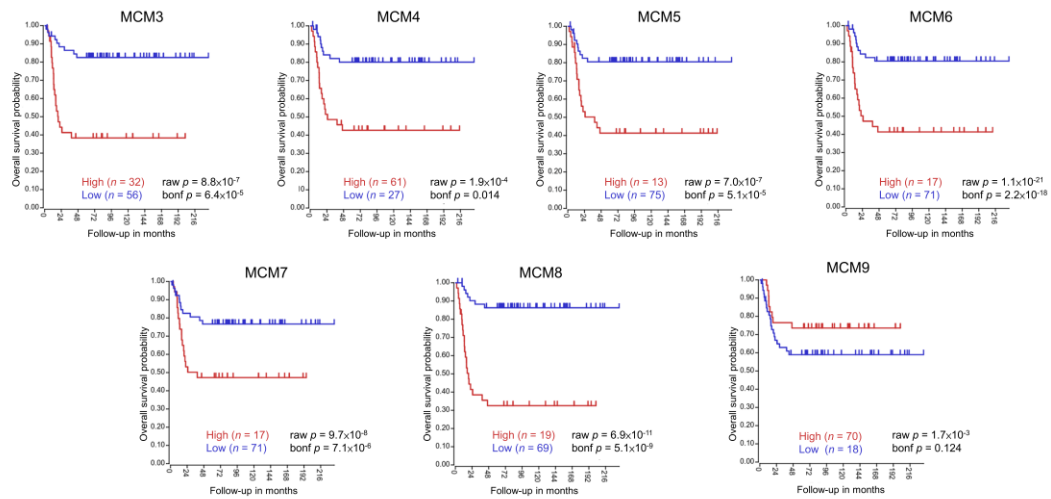

**Figure S3. The over-all survival of neuroblastoma patients stratified by expression of each of *MCM* member genes in the Versteeg-88 database**

The over-all survival was visualized by Kaplan Curve. High and low expression were denoted as red and blue, respectively. High expression of *MCM* genes correlated with poor survival except *MCM9*.

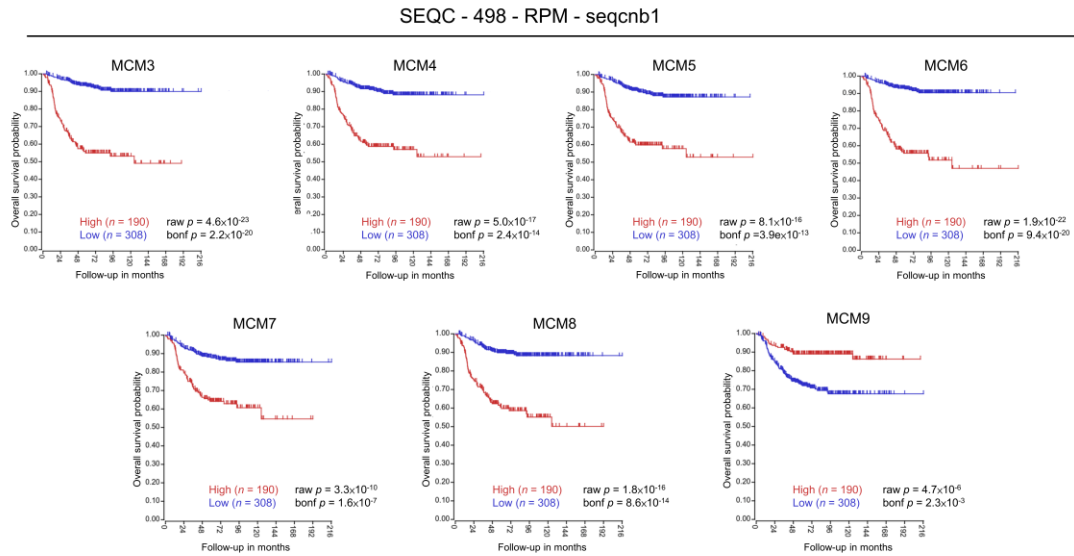

**Figure S4. The over-all survival of neuroblastoma patients stratified by expression of each of *MCM* member genes in the SEQC-498 database**

The over-all survival was visualized by Kaplan Curve. High and low expression were denoted as red and blue, respectively. High expression of *MCM* genes correlated with poor survival except *MCM9*.

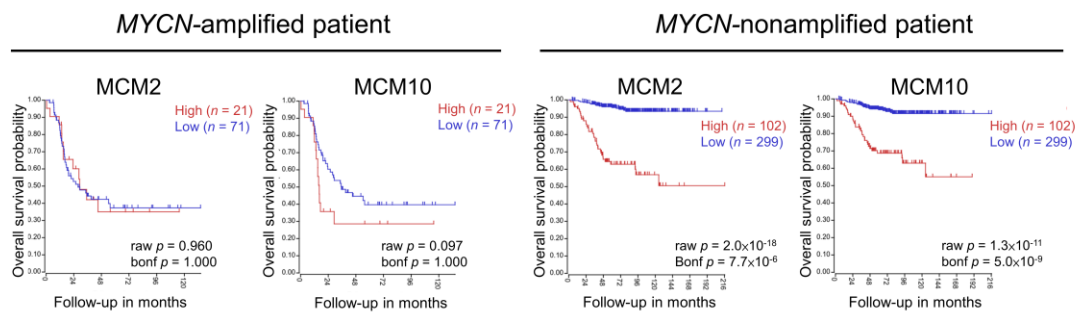

**Figure S5. The overall survival of patients *MYCN*-amplified or *MYCN*-nonamplified tumor and stratified by expression of *MCM2* or *MCM10* in different databases**

The over-all survival was visualized by Kaplan Curve. High and low expression were denoted as the color red and blue, respectively. In *MYCN*-amplified samples, the difference between survival rates was not significant. In *MYCN*-nonamplified tumors, high expression of *MCM2* and *MCM10* correlated with poor survival.

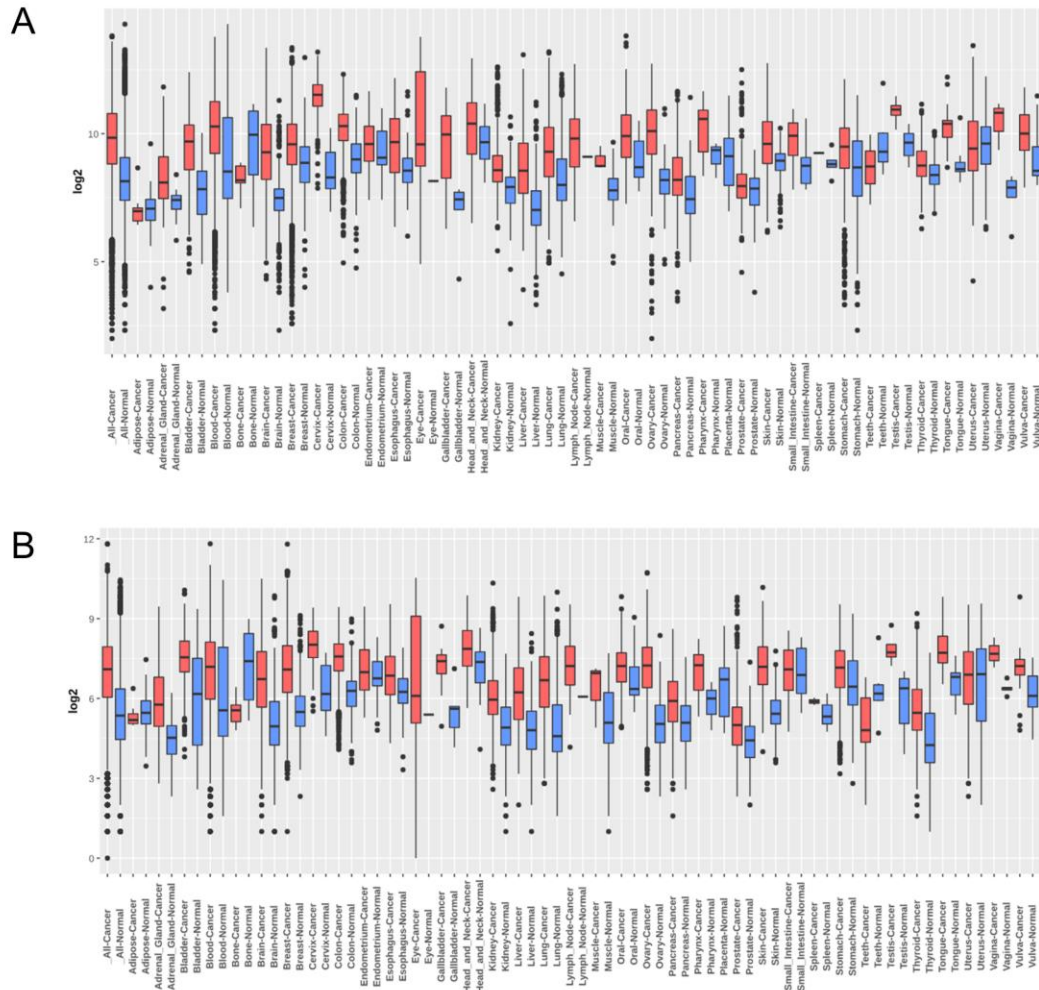

**Figure S6. *MCM2* and *MCM10* expression across 35 cancer types and corresponding normal tissue**

Expression of (A) *MCM2* and (B) *MCM10* across 35 tumor types. Using HG-U133\_Plus\_2 platform, the analysis was down by GENT2. The blue bars represent normal cells and red bars represent cancer cells.

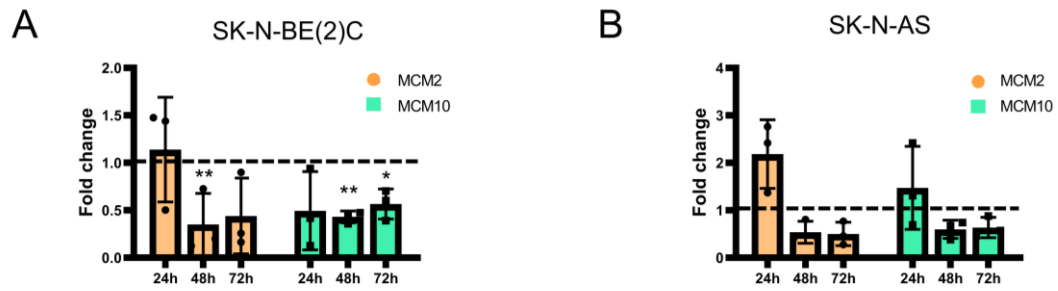

**Figure S7. Protein expressions of Knockdown efficiency of MCM2 and MCM10 in two cell lines**

The data represent the average protein expressions of MCM2 and MCM10 normalized by  $\beta$ -actin. \* $P < 0.05$ , \*\* $P < 0.01$  from two-tailed unpaired Student's  $t$ -test to determine whether the mean value of a given group is equal to the corresponding siCtrl group alone group



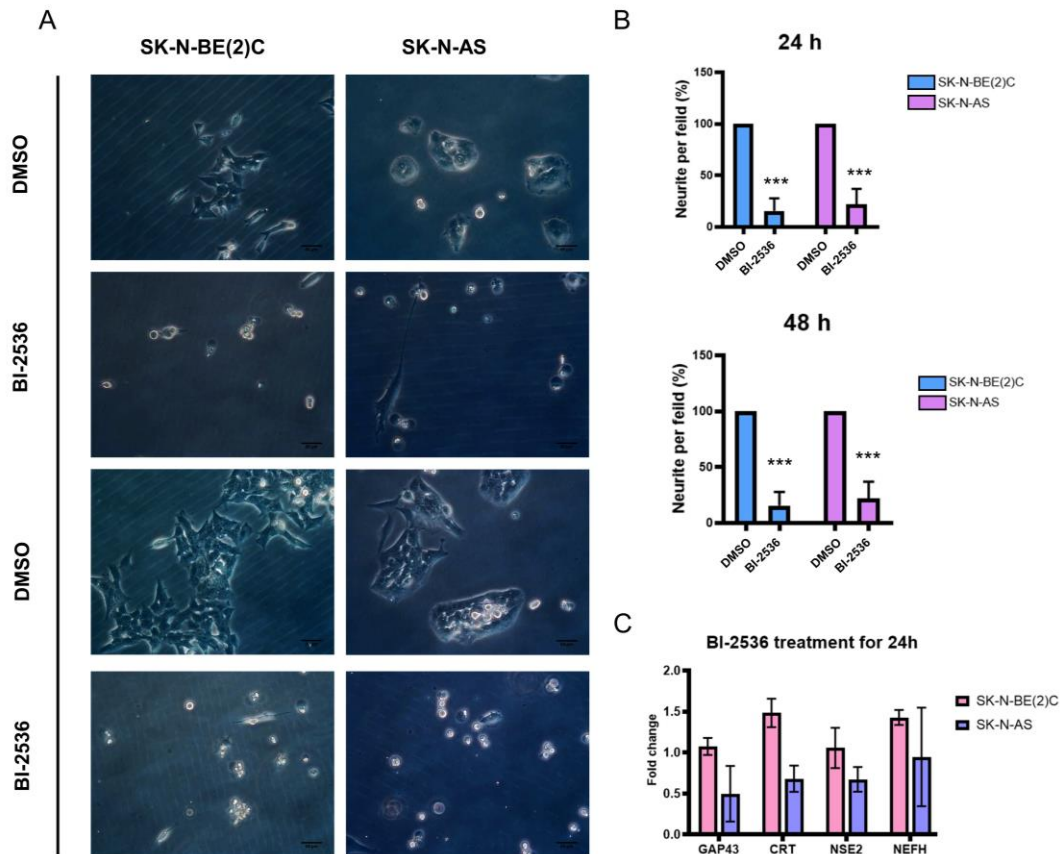

**Figure S8. Cell morphology and expression changes of differentiation markers after BI-2536 treatment in neuroblastoma cells**

(A) The number of neurites were decreased after BI-2536 treatment for 24 and 48 h. The cells floated from the bottom of culture dish and shrunk into ball shape, indicating cell death. (B) Statistical neurites number per cell per field reveal that neurites significantly decreased after BI-2536 treatment in SK-N-BE(2)C and SK-N-AS for 24 h. (C) Common differentional marker genes: *GAP43*, *CRT*, *NSE2* and *NEFH* were checked by qRT-PCR. No significant change of differentiation markers was observed (upregulation of the marker genes indicate differentiation). The results show that cells did not undergo differentiation after BI-2536 treatment. \* $P < 0.05$ , \*\* $P < 0.01$ , \*\*\* $P < 0.001$  from two-tailed unpair student *t*-test..

**Table S1. Recurrently regulated *MCM2* by perturbations (d24 recurrent pairs)**

| Perturbagen       | REC     | FDR                   | Relative rank |       |       |        |       |       |       |       |       |       |
|-------------------|---------|-----------------------|---------------|-------|-------|--------|-------|-------|-------|-------|-------|-------|
|                   |         |                       | A375          | A549  | HA1E  | HCC515 | HEPG2 | HT29  | MCF7  | NPC   | PC3   | VCAP  |
| artesanate        | −6.0573 | 8.56×10 <sup>−4</sup> | 0.006         | 0.321 | 0.207 | 0.000  | NA    | 0.021 | 0.001 | NA    | 0.001 | 0.000 |
| docetaxel         | −6.1232 | 7.67×10 <sup>−4</sup> | NA            | 0.005 | NA    | NA     | NA    | NA    | 0.001 | 0.122 | 0.003 | 0.001 |
| quiflapon         | −6.1532 | 7.29×10 <sup>−4</sup> | 0.014         | 0.185 | 0.123 | 0.001  | NA    | 0.223 | 0.009 | NA    | 0.003 | 0.014 |
| CGK-733           | −6.3290 | 5.45×10 <sup>−4</sup> | NA            | 0.014 | 0.227 | 0.011  | 0.198 | NA    | 0.017 | 0.038 | 0.009 | 0.027 |
| AG-592            | −6.4041 | 4.80×10 <sup>−4</sup> | NA            | 0.020 | 0.135 | 0.004  | NA    | NA    | 0.005 | 0.064 | 0.003 | 0.137 |
| KF-38789          | −6.5298 | 3.88×10 <sup>−4</sup> | NA            | 0.044 | 0.068 | 0.074  | NA    | NA    | 0.064 | 0.011 | 0.001 | 0.099 |
| IKK-16            | −6.6782 | 3.02×10 <sup>−4</sup> | NA            | 0.025 | NA    | 0.011  | NA    | NA    | 0.052 | NA    | 0.012 | 0.005 |
| ABT-751           | −6.7639 | 2.61×10 <sup>−4</sup> | 0.235         | 0.092 | 0.003 | 0.014  | NA    | 0.010 | 0.116 | NA    | 0.001 | 0.005 |
| rottlerin         | −6.8778 | 2.15×10 <sup>−4</sup> | 0.061         | 0.206 | 0.074 | 0.002  | NA    | 0.026 | 0.021 | 0.141 | 0.022 | 0.108 |
| sunitinib         | −7.1219 | 1.42×10 <sup>−4</sup> | NA            | 0.029 | NA    | NA     | NA    | NA    | 0.001 | 0.005 | 0.044 | 0.005 |
| TG-101348         | −7.1842 | 1.27×10 <sup>−4</sup> | 0.013         | 0.199 | NA    | 0.001  | NA    | 0.007 | 0.021 | NA    | 0.008 | 0.027 |
| albendazole       | −7.2407 | 1.16×10 <sup>−4</sup> | NA            | 0.057 | 0.095 | 0.015  | NA    | NA    | 0.004 | 0.053 | 0.001 | 0.058 |
| selumetinib       | −7.2982 | 1.05×10 <sup>−4</sup> | 0.021         | 0.148 | 0.015 | 0.005  | NA    | 0.003 | 0.021 | NA    | 0.037 | 0.166 |
| oxibendazole      | −7.4911 | 7.57×10 <sup>−4</sup> | NA            | 0.151 | 0.055 | 0.003  | NA    | NA    | 0.021 | 0.007 | 0.009 | 0.008 |
| vinorelbine       | −7.5082 | 7.33×10 <sup>−4</sup> | NA            | 0.015 | NA    | NA     | NA    | NA    | 0.036 | 0.019 | 0.001 | 0.000 |
| podophyllotoxin   | −7.6482 | 5.74×10 <sup>−5</sup> | NA            | 0.058 | 0.005 | 0.245  | 0.031 | NA    | 0.007 | 0.003 | 0.002 | 0.009 |
| GW-843682X        | −8.2286 | 2.12×10 <sup>−5</sup> | 0.168         | 0.163 | 0.008 | 0.025  | NA    | 0.005 | 0.002 | 0.083 | 0.000 | 0.002 |
| IKK-2-inhibitor-V | −8.2617 | 2.00×10 <sup>−5</sup> | 0.048         | 0.268 | 0.211 | 0.003  | 0.007 | 0.008 | 0.032 | 0.011 | 0.005 | 0.005 |
| brefeldin-a       | −8.2836 | 1.93×10 <sup>−5</sup> | 0.014         | 0.011 | 0.120 | 0.174  | NA    | 0.005 | 0.006 | 0.075 | 0.008 | 0.043 |
| cyclosporin-a     | −8.3180 | 1.82×10 <sup>−5</sup> | 0.011         | 0.097 | 0.234 | 0.003  | NA    | 0.043 | 0.016 | 0.007 | 0.020 | 0.011 |
| LY-2183240        | −8.4441 | 1.47×10 <sup>−5</sup> | 0.277         | 0.190 | 0.020 | 0.001  | 0.022 | 0.007 | 0.006 | 0.022 | 0.001 | 0.025 |

|                               |          |                        |       |       |       |       |       |       |       |       |       |       |
|-------------------------------|----------|------------------------|-------|-------|-------|-------|-------|-------|-------|-------|-------|-------|
| nocodazole                    | −8.7660  | 8.38×10 <sup>−6</sup>  | NA    | 0.090 | 0.004 | 0.006 | NA    | NA    | 0.001 | 0.006 | 0.043 | 0.020 |
| malonoben                     | −9.2423  | 3.63×10 <sup>−6</sup>  | NA    | 0.021 | 0.061 | 0.003 | 0.010 | NA    | 0.010 | 0.121 | 0.006 | 0.006 |
| tosedostat                    | −9.6645  | 1.74×10 <sup>−6</sup>  | 0.021 | 0.009 | 0.130 | 0.001 | NA    | 0.009 | 0.033 | NA    | 0.004 | 0.002 |
| PD-198306                     | −9.7274  | 1.56×10 <sup>−6</sup>  | NA    | 0.013 | 0.060 | 0.015 | NA    | NA    | 0.011 | 0.016 | 0.009 | 0.001 |
| methyl-2,5-dihydroxycinnamate | −9.9580  | 1.05×10 <sup>−6</sup>  | NA    | 0.018 | 0.003 | 0.008 | NA    | NA    | 0.014 | 0.004 | 0.056 | 0.013 |
| BI-2536                       | −10.1788 | 7.03×10 <sup>−7</sup>  | 0.010 | 0.004 | 0.051 | 0.002 | NA    | 0.046 | 0.001 | NA    | 0.004 | 0.067 |
| apicidin                      | −10.2436 | 6.30×10 <sup>−7</sup>  | 0.057 | 0.070 | 0.039 | 0.002 | 0.136 | 0.006 | 0.004 | 0.040 | 0.042 | 0.004 |
| ISOX                          | −10.6127 | 3.25×10 <sup>−7</sup>  | 0.037 | 0.059 | 0.023 | 0.002 | NA    | 0.004 | 0.012 | 0.082 | 0.002 | 0.033 |
| vinblastine                   | −12.5962 | 9.17×10 <sup>−9</sup>  | NA    | 0.002 | 0.003 | 0.005 | 0.062 | NA    | 0.003 | 0.008 | 0.002 | 0.006 |
| vincristine                   | −13.9180 | 8.59×10 <sup>−10</sup> | NA    | 0.005 | 0.001 | 0.002 | NA    | NA    | 0.002 | 0.016 | 0.000 | 0.005 |

**Table S2. Recurrently regulated *MCM2* by perturbations (d6 recurrent pairs)**

| Perturbagen    | REC     | FDR                   | Relative rank |       |       |        |       |       |       |       |       |       |
|----------------|---------|-----------------------|---------------|-------|-------|--------|-------|-------|-------|-------|-------|-------|
|                |         |                       | A375          | A549  | HA1E  | HCC515 | HEPG2 | HT29  | MCF7  | NPC   | PC3   | VCAP  |
| palbociclib    | −5.6381 | 9.73×10 <sup>−4</sup> | 0.010         | 0.001 | 0.512 | 0.001  | 0.198 | 0.002 | 0.002 | NA    | 0.003 | 0.043 |
| parthenolide   | −5.6463 | 9.60×10 <sup>−4</sup> | 0.401         | 0.021 | 0.017 | 0.002  | 0.025 | 0.095 | 0.027 | NA    | 0.183 | 0.090 |
| radicicol      | −5.6573 | 9.41×10 <sup>−4</sup> | 0.076         | 0.121 | 0.083 | 0.159  | 0.258 | 0.009 | 0.110 | NA    | 0.099 | 0.002 |
| prostratin     | −5.8055 | 7.29×10 <sup>−4</sup> | 0.066         | 0.049 | 0.047 | 0.025  | 0.032 | 0.035 | 0.045 | NA    | 0.021 | 0.466 |
| scriptaid      | −6.2381 | 3.45×10 <sup>−4</sup> | 0.286         | 0.007 | 0.076 | 0.174  | 0.022 | 0.012 | 0.019 | 0.030 | 0.176 | 0.196 |
| BI−2536        | −6.2539 | 3.35×10 <sup>−4</sup> | 0.085         | 0.019 | 0.011 | 0.126  | 0.358 | 0.015 | 0.043 | NA    | 0.021 | 0.064 |
| RO−28−1675     | −6.3456 | 2.86×10 <sup>−4</sup> | 0.162         | 0.105 | 0.232 | 0.085  | 0.006 | 0.092 | 0.054 | NA    | 0.013 | 0.010 |
| WT−171         | −6.3704 | 2.74×10 <sup>−4</sup> | 0.018         | 0.042 | 0.140 | 0.035  | NA    | 0.111 | 0.011 | NA    | 0.151 | 0.049 |
| apicidin       | −6.5125 | 2.13×10 <sup>−4</sup> | 0.228         | 0.159 | 0.205 | 0.027  | 0.123 | 0.017 | 0.028 | 0.112 | 0.029 | 0.021 |
| PHA−793887     | −6.5975 | 1.84×10 <sup>−4</sup> | 0.059         | 0.118 | 0.138 | 0.020  | 0.194 | 0.039 | 0.033 | NA    | 0.100 | 0.018 |
| niclosamide    | −6.6376 | 1.71×10 <sup>−4</sup> | 0.158         | 0.062 | 0.038 | 0.004  | 0.149 | 0.043 | 0.042 | 0.300 | 0.105 | 0.009 |
| trichostatin−a | −6.6620 | 1.64×10 <sup>−4</sup> | 0.184         | 0.019 | 0.090 | 0.169  | 0.113 | 0.046 | 0.048 | 0.216 | 0.026 | 0.008 |
| ISOX           | −6.7695 | 1.36×10 <sup>−4</sup> | 0.153         | 0.027 | 0.009 | 0.017  | 0.079 | 0.077 | 0.206 | 0.028 | 0.229 | 0.066 |
| cucurbitacin−i | −6.8051 | 1.27×10 <sup>−4</sup> | 0.254         | 0.019 | 0.002 | 0.008  | 0.047 | 0.060 | 0.241 | NA    | 0.013 | 0.002 |
| dorsomorphin   | −6.8147 | 1.25×10 <sup>−4</sup> | 0.219         | 0.017 | 0.074 | 0.040  | 0.004 | 0.082 | 0.076 | NA    | 0.071 | 0.094 |
| dacinostat     | −7.0069 | 8.90×10 <sup>−5</sup> | 0.038         | 0.069 | 0.173 | 0.037  | 0.079 | 0.129 | 0.005 | NA    | 0.100 | 0.014 |
| NCH−51         | −7.0480 | 8.27×10 <sup>−5</sup> | 0.188         | 0.098 | 0.023 | 0.043  | NA    | 0.068 | 0.088 | 0.007 | 0.101 | 0.023 |
| XMD−1499       | −7.1139 | 7.37×10 <sup>−5</sup> | 0.015         | 0.005 | 0.110 | 0.004  | 0.046 | 0.002 | 0.006 | NA    | 0.011 | 0.367 |

|                                |          |                       |       |       |       |       |       |       |       |       |       |       |
|--------------------------------|----------|-----------------------|-------|-------|-------|-------|-------|-------|-------|-------|-------|-------|
| merck-ketone                   | -7.1667  | $6.70 \times 10^{-5}$ | 0.039 | 0.167 | 0.021 | 0.054 | 0.155 | 0.000 | 0.100 | NA    | 0.018 | 0.062 |
| vorinostat                     | -7.3214  | $5.09 \times 10^{-5}$ | 0.091 | 0.034 | 0.233 | 0.070 | 0.111 | 0.030 | 0.026 | 0.034 | 0.146 | 0.010 |
| phorbol-12-myristat-13-acetate | -7.5884  | $3.18 \times 10^{-5}$ | 0.108 | 0.067 | 0.026 | 0.011 | 0.008 | 0.026 | 0.080 | NA    | 0.127 | 0.104 |
| MK-1775                        | -10.2058 | $2.72 \times 10^{-5}$ | 0.146 | 0.010 | 0.017 | 0.022 | 0.039 | 0.023 | 0.006 | NA    | 0.007 | 0.006 |

**Table S3. Recurrently regulated *MCM10* by perturbations (d24 recurrent pairs)**

| Perturbagen            | REC     | FDR                   | Relative rank |       |       |        |       |       |       |       |       |       |
|------------------------|---------|-----------------------|---------------|-------|-------|--------|-------|-------|-------|-------|-------|-------|
|                        |         |                       | A375          | A549  | HA1E  | HCC515 | HEPG2 | HT29  | MCF7  | NPC   | PC3   | VCAP  |
| suloctidil             | -5.9732 | 9.82×10 <sup>-4</sup> | NA            | 0.024 | 0.121 | 0.015  | NA    | NA    | 0.005 | 0.184 | 0.037 | 0.039 |
| YM-155                 | -5.9893 | 9.57×10 <sup>-4</sup> | 0.024         | 0.150 | 0.081 | 0.032  | NA    | 0.015 | 0.094 | 0.159 | 0.220 | 0.065 |
| ZM-336372              | -6.0067 | 9.30×10 <sup>-4</sup> | 0.068         | 0.082 | 0.171 | 0.035  | NA    | 0.004 | 0.010 | NA    | 0.011 | 0.226 |
| MST-312                | -6.0531 | 8.62×10 <sup>-4</sup> | 0.016         | 0.029 | 0.129 | 0.110  | NA    | 0.013 | 0.023 | NA    | 0.109 | 0.179 |
| sorafenib              | -6.0633 | 8.47×10 <sup>-4</sup> | 0.185         | 0.020 | NA    | NA     | NA    | NA    | 0.036 | 0.003 | 0.006 | 0.001 |
| selamectin             | -6.1658 | 7.13×10 <sup>-4</sup> | NA            | 0.007 | NA    | 0.003  | NA    | NA    | 0.002 | NA    | 0.109 | 0.008 |
| BIBU-1361              | -6.1774 | 7.00×10 <sup>-4</sup> | 0.001         | 0.221 | 0.062 | NA     | NA    | 0.005 | 0.000 | NA    | 0.092 | 0.008 |
| loperamide             | -6.1989 | 6.75×10 <sup>-4</sup> | 0.010         | 0.472 | 0.065 | 0.044  | NA    | 0.001 | 0.002 | 0.066 | 0.013 | 0.010 |
| lylamine               | -6.2095 | 6.64×10 <sup>-4</sup> | NA            | 0.197 | 0.008 | 0.009  | NA    | NA    | 0.028 | 0.033 | 0.036 | 0.080 |
| mycophenolat×10mofetil | -6.2247 | 6.48×10 <sup>-4</sup> | NA            | 0.038 | 0.120 | 0.044  | NA    | NA    | 0.004 | 0.022 | 0.046 | 0.122 |
| BIBX-1382              | -6.2715 | 5.99×10 <sup>-4</sup> | NA            | 0.005 | 0.282 | 0.002  | NA    | NA    | 0.000 | 0.021 | 0.023 | 0.025 |
| tricitabine            | -6.2889 | 5.82×10 <sup>-4</sup> | NA            | 0.156 | 0.048 | 0.018  | NA    | NA    | 0.007 | 0.083 | 0.003 | 0.070 |
| fluspirilene           | -6.3306 | 5.44×10 <sup>-4</sup> | 0.000         | 0.048 | 0.376 | 0.010  | NA    | 0.027 | 0.002 | 0.041 | 0.118 | 0.092 |
| LY-303511              | -6.3380 | 5.37×10 <sup>-4</sup> | NA            | 0.037 | 0.011 | 0.018  | NA    | NA    | 0.088 | 0.002 | 0.170 | 0.051 |
| sulconazole            | -6.3527 | 5.23×10 <sup>-4</sup> | NA            | 0.132 | 0.147 | 0.007  | NA    | NA    | 0.003 | 0.002 | 0.050 | 0.034 |
| T-98475                | -6.3769 | 5.02×10 <sup>-4</sup> | NA            | 0.083 | 0.023 | 0.003  | NA    | NA    | 0.013 | 0.218 | 0.018 | 0.004 |
| KU-0060648             | -6.4173 | 4.69×10 <sup>-4</sup> | 0.002         | 0.004 | 0.376 | 0.002  | NA    | 0.078 | 0.005 | NA    | 0.002 | 0.013 |
| tyrphostin-A9          | -6.4553 | 4.40×10 <sup>-4</sup> | NA            | 0.036 | NA    | NA     | 0.013 | NA    | 0.006 | 0.134 | 0.009 | 0.022 |

|                 |         |                       |       |       |       |       |       |       |       |       |       |       |
|-----------------|---------|-----------------------|-------|-------|-------|-------|-------|-------|-------|-------|-------|-------|
| geldanamycin    | −6.4578 | 4.38×10 <sup>−4</sup> | 0.023 | 0.030 | 0.361 | 0.003 | 0.017 | 0.226 | 0.002 | 0.042 | 0.029 | 0.179 |
| linsitinib      | −6.4645 | 4.33×10 <sup>−4</sup> | 0.016 | 0.141 | 0.244 | 0.028 | NA    | 0.008 | 0.001 | NA    | 0.078 | 0.006 |
| staurosporine   | −6.5306 | 3.87×10 <sup>−4</sup> | 0.025 | 0.007 | 0.267 | 0.017 | 0.005 | 0.077 | 0.009 | NA    | 0.029 | 0.256 |
| CCCP            | −6.5470 | 3.77×10 <sup>−4</sup> | NA    | 0.008 | 0.094 | 0.001 | NA    | NA    | 0.001 | 0.190 | 0.033 | 0.019 |
| amiodarone      | −6.5978 | 3.46×10 <sup>−4</sup> | 0.003 | 0.002 | 0.389 | 0.036 | NA    | 0.002 | 0.030 | 0.023 | 0.092 | 0.078 |
| neratinib       | −6.6193 | 3.34×10 <sup>−4</sup> | 0.008 | 0.095 | NA    | 0.003 | NA    | 0.027 | 0.009 | NA    | 0.100 | 0.105 |
| NNC−05−2090     | −6.6815 | 3.01×10 <sup>−4</sup> | NA    | 0.180 | 0.084 | 0.003 | NA    | NA    | 0.001 | 0.046 | 0.011 | 0.009 |
| triptolide      | −6.7051 | 2.89×10 <sup>−4</sup> | 0.009 | 0.030 | 0.025 | 0.117 | NA    | 0.017 | 0.077 | NA    | 0.010 | 0.209 |
| lasalocid       | −6.7274 | 2.78×10 <sup>−4</sup> | 0.002 | 0.001 | 0.330 | 0.002 | NA    | 0.036 | 0.083 | 0.178 | 0.006 | 0.008 |
| atorvastatin    | −6.7490 | 2.68×10 <sup>−4</sup> | 0.001 | 0.087 | 0.075 | 0.003 | 0.115 | 0.205 | 0.000 | 0.355 | 0.005 | 0.008 |
| malonoben       | −6.7995 | 2.46×10 <sup>−4</sup> | NA    | 0.228 | 0.025 | 0.002 | 0.003 | NA    | 0.002 | 0.198 | 0.001 | 0.004 |
| TW−37           | −6.8003 | 2.46×10 <sup>−4</sup> | 0.003 | 0.007 | 0.158 | 0.024 | NA    | 0.067 | 0.004 | NA    | 0.041 | 0.177 |
| purvalanol−a    | −6.8423 | 2.29×10 <sup>−4</sup> | 0.057 | 0.017 | 0.066 | NA    | NA    | 0.003 | 0.002 | NA    | 0.006 | 0.167 |
| sirolimus       | −6.8500 | 2.26×10 <sup>−4</sup> | 0.021 | 0.002 | 0.026 | 0.001 | 0.089 | 0.537 | 0.003 | 0.002 | 0.029 | 0.002 |
| RS−17053        | −6.8627 | 2.21×10 <sup>−4</sup> | NA    | 0.040 | 0.071 | 0.011 | NA    | NA    | 0.029 | NA    | 0.000 | 0.041 |
| bithionol       | −6.8970 | 2.08×10 <sup>−4</sup> | NA    | 0.185 | 0.042 | 0.005 | NA    | NA    | 0.004 | 0.003 | 0.063 | 0.006 |
| fostamatinib    | −6.9012 | 2.07×10 <sup>−4</sup> | 0.003 | 0.088 | 0.302 | 0.005 | NA    | 0.001 | 0.029 | NA    | 0.005 | 0.005 |
| rhodomyrtoxin−b | −6.9904 | 1.78×10 <sup>−4</sup> | 0.005 | 0.003 | 0.058 | NA    | NA    | 0.005 | 0.085 | NA    | 0.001 | 0.145 |
| VER−155008      | −7.0659 | 1.56×10 <sup>−4</sup> | 0.000 | 0.075 | 0.151 | 0.002 | NA    | 0.143 | 0.003 | NA    | 0.033 | 0.040 |
| maprotiline     | −7.0908 | 1.50×10 <sup>−4</sup> | 0.038 | 0.029 | 0.053 | 0.003 | NA    | 0.189 | 0.013 | 0.066 | 0.058 | 0.175 |
| KO−143          | −7.0978 | 1.48×10 <sup>−4</sup> | 0.014 | 0.049 | 0.302 | 0.003 | NA    | 0.006 | 0.002 | NA    | 0.001 | 0.034 |
| dorsomorphin    | −7.1013 | 1.47×10 <sup>−4</sup> | 0.002 | 0.183 | 0.151 | 0.009 | NA    | 0.016 | 0.014 | 0.005 | 0.004 | 0.221 |

|                    |         |                       |       |       |       |       |       |       |       |       |       |       |
|--------------------|---------|-----------------------|-------|-------|-------|-------|-------|-------|-------|-------|-------|-------|
| NVP-TAE684         | -7.1072 | 1.46×10 <sup>-4</sup> | NA    | 0.008 | NA    | NA    | NA    | NA    | 0.006 | 0.026 | 0.019 | 0.027 |
| CGP-71683          | -7.1601 | 1.33×10 <sup>-4</sup> | NA    | 0.003 | 0.025 | 0.006 | NA    | NA    | 0.004 | 0.216 | 0.007 | 0.012 |
| DG-041             | -7.1660 | 1.32×10 <sup>-4</sup> | 0.002 | 0.050 | 0.320 | 0.002 | NA    | 0.012 | 0.002 | NA    | 0.004 | 0.002 |
| COL-3              | -7.1931 | 1.26×10 <sup>-4</sup> | 0.032 | 0.010 | 0.253 | 0.005 | 0.037 | 0.029 | 0.043 | NA    | 0.008 | NA    |
| calcitriol         | -7.2429 | 1.16×10 <sup>-4</sup> | 0.172 | 0.050 | 0.025 | 0.001 | NA    | 0.094 | 0.010 | 0.181 | 0.005 | 0.061 |
| tunicamycin        | -7.2924 | 1.06×10 <sup>-4</sup> | NA    | 0.007 | NA    | NA    | NA    | NA    | 0.012 | 0.036 | 0.017 | 0.007 |
| perhexiline        | -7.3452 | 9.73×10 <sup>-5</sup> | 0.005 | 0.185 | 0.128 | 0.021 | NA    | 0.011 | 0.004 | NA    | 0.000 | 0.053 |
| WY×10354           | -7.4236 | 8.51×10 <sup>-5</sup> | NA    | 0.017 | NA    | NA    | NA    | NA    | 0.025 | 0.029 | 0.002 | 0.001 |
| mitoxantrone       | -7.5200 | 7.19×10 <sup>-5</sup> | 0.004 | 0.003 | 0.015 | NA    | 0.005 | 0.006 | 0.000 | NA    | 0.004 | 0.315 |
| FGIN-1-27          | -7.5801 | 6.47×10 <sup>-5</sup> | 0.026 | 0.065 | 0.108 | 0.060 | NA    | 0.004 | 0.010 | NA    | 0.003 | 0.113 |
| vorinostat         | -7.5940 | 6.31×10 <sup>-5</sup> | 0.051 | 0.094 | 0.034 | 0.004 | 0.022 | 0.359 | 0.011 | 0.033 | 0.038 | 0.049 |
| chlorpromazine     | -7.6054 | 6.19×10 <sup>-5</sup> | 0.142 | 0.001 | 0.043 | 0.004 | NA    | NA    | 0.000 | 0.086 | 0.098 | 0.009 |
| nonoxynol-9        | -7.6904 | 5.34×10 <sup>-5</sup> | NA    | 0.104 | 0.015 | 0.002 | NA    | NA    | 0.007 | 0.001 | 0.027 | 0.085 |
| L-690488           | -7.7691 | 4.66×10 <sup>-5</sup> | 0.003 | 0.153 | 0.126 | 0.003 | NA    | 0.007 | 0.028 | NA    | 0.005 | 0.037 |
| tyrphostin-AG-1478 | -7.7823 | 4.56×10 <sup>-5</sup> | 0.002 | 0.142 | 0.144 | 0.006 | NA    | 0.013 | 0.000 | 0.177 | 0.001 | 0.029 |
| NVP-AUY922         | -7.8486 | 4.07×10 <sup>-5</sup> | 0.001 | 0.020 | 0.252 | 0.014 | NA    | 0.003 | 0.005 | NA    | 0.030 | 0.011 |
| WY×10125132        | -7.8701 | 3.92×10 <sup>-5</sup> | NA    | 0.012 | NA    | NA    | NA    | NA    | 0.001 | 0.003 | 0.016 | 0.028 |
| AKT-inhibitor-1-2  | -8.0936 | 2.67×10 <sup>-5</sup> | 0.005 | 0.083 | NA    | 0.001 | NA    | 0.095 | 0.022 | NA    | 0.001 | 0.005 |
| tosedostat         | -8.1202 | 2.56×10 <sup>-5</sup> | 0.021 | 0.164 | 0.118 | 0.004 | NA    | 0.008 | 0.001 | NA    | 0.006 | 0.001 |
| BX-795             | -8.3943 | 1.60×10 <sup>-5</sup> | 0.001 | 0.144 | 0.082 | 0.003 | NA    | 0.064 | 0.002 | NA    | 0.006 | 0.001 |
| PIK-90             | -8.6119 | 1.10×10 <sup>-5</sup> | 0.005 | 0.193 | 0.065 | 0.002 | NA    | 0.003 | 0.002 | NA    | 0.004 | 0.002 |
| BI-2536            | -8.7633 | 8.42×10 <sup>-6</sup> | 0.003 | 0.106 | 0.027 | 0.023 | NA    | 0.077 | 0.018 | NA    | 0.007 | 0.017 |



|                   |          |                        |       |       |       |       |       |       |       |       |       |       |
|-------------------|----------|------------------------|-------|-------|-------|-------|-------|-------|-------|-------|-------|-------|
| torin-1           | -8.7771  | 8.21×10 <sup>-6</sup>  | NA    | 0.005 | NA    | NA    | NA    | NA    | 0.007 | 0.003 | 0.003 | 0.021 |
| BMS-754807        | -8.8381  | 7.36×10 <sup>-6</sup>  | 0.007 | 0.166 | 0.082 | 0.002 | NA    | 0.001 | 0.001 | NA    | 0.001 | 0.000 |
| KU-0063794        | -8.9604  | 5.95×10 <sup>-6</sup>  | 0.001 | 0.159 | 0.076 | 0.005 | NA    | 0.008 | 0.003 | NA    | 0.001 | 0.001 |
| CGK-733           | -9.1837  | 4.03×10 <sup>-6</sup>  | NA    | 0.008 | 0.032 | 0.005 | 0.033 | NA    | 0.001 | 0.086 | 0.009 | 0.071 |
| cucurbitacin-i    | -9.1949  | 3.95×10 <sup>-6</sup>  | 0.023 | 0.017 | 0.015 | 0.013 | 0.014 | 0.017 | 0.017 | 0.310 | 0.014 | 0.033 |
| AKT-inhibitor-IV  | -9.3745  | 2.88×10 <sup>-6</sup>  | NA    | 0.029 | NA    | 0.002 | NA    | 0.006 | 0.006 | NA    | 0.008 | 0.022 |
| GR-127935         | -9.4147  | 2.68×10 <sup>-6</sup>  | NA    | 0.016 | 0.008 | 0.008 | NA    | NA    | 0.001 | 0.080 | 0.019 | 0.004 |
| cytochalasin-b    | -9.4461  | 2.54×10 <sup>-6</sup>  | 0.002 | 0.037 | 0.013 | 0.003 | NA    | 0.054 | 0.017 | NA    | 0.032 | 0.070 |
| NVP-BEZ235        | -10.0773 | 8.46×10 <sup>-7</sup>  | 0.002 | 0.013 | 0.231 | 0.001 | NA    | 0.001 | 0.018 | 0.001 | 0.001 | 0.001 |
| PI-828            | -10.1610 | 7.25×10 <sup>-7</sup>  | NA    | 0.009 | 0.018 | 0.002 | NA    | NA    | 0.003 | 0.067 | 0.006 | 0.002 |
| artesanate        | -10.2138 | 6.64×10 <sup>-7</sup>  | 0.003 | 0.053 | 0.075 | 0.004 | NA    | 0.002 | 0.041 | NA    | 0.001 | 0.002 |
| IKK-16            | -10.8060 | 2.27×10 <sup>-7</sup>  | NA    | 0.001 | NA    | 0.002 | NA    | NA    | 0.004 | NA    | 0.008 | 0.001 |
| AZD-8055          | -11.1692 | 1.17×10 <sup>-7</sup>  | 0.003 | 0.064 | 0.054 | 0.008 | NA    | 0.002 | 0.000 | NA    | 0.004 | 0.001 |
| ivermectin        | -11.2949 | 9.33×10 <sup>-8</sup>  | NA    | 0.014 | 0.016 | 0.001 | NA    | NA    | 0.000 | NA    | 0.001 | 0.002 |
| PD-198306         | -11.3662 | 8.20×10 <sup>-8</sup>  | NA    | 0.005 | 0.036 | 0.005 | NA    | NA    | 0.004 | 0.005 | 0.001 | 0.017 |
| IKK-2-inhibitor-V | -11.6204 | 5.11×10 <sup>-8</sup>  | 0.003 | 0.012 | 0.005 | 0.003 | 0.005 | 0.002 | 0.002 | 0.203 | 0.002 | 0.038 |
| niguldipine       | -11.7793 | 3.85×10 <sup>-8</sup>  | 0.002 | 0.090 | 0.011 | 0.002 | NA    | 0.005 | 0.001 | NA    | 0.001 | 0.001 |
| cyclosporin-a     | -12.2548 | 1.68×10 <sup>-8</sup>  | 0.008 | 0.006 | 0.034 | 0.010 | NA    | 0.003 | 0.005 | 0.095 | 0.003 | 0.001 |
| rottlerin         | -12.4102 | 1.28×10 <sup>-8</sup>  | 0.006 | 0.030 | 0.014 | 0.003 | NA    | 0.003 | 0.004 | 0.066 | 0.002 | 0.032 |
| niclosamide       | -12.5238 | 1.05×10 <sup>-8</sup>  | 0.001 | 0.024 | 0.015 | 0.020 | NA    | 0.013 | 0.004 | 0.058 | 0.001 | 0.020 |
| TGX-115           | -13.3308 | 2.50×10 <sup>-9</sup>  | 0.001 | 0.017 | 0.025 | 0.003 | NA    | 0.003 | 0.020 | NA    | 0.002 | 0.002 |
| TG-101348         | -14.1153 | 6.13×10 <sup>-10</sup> | 0.002 | 0.008 | NA    | 0.002 | NA    | 0.004 | 0.002 | NA    | 0.002 | 0.008 |

**Table S4. Recurrently regulated *MCM10* by perturbations (d6 recurrent pairs)**

| Perturbagen       | REC     | FDR                   | Relative rank |       |       |        |       |       |       |       |       |       |
|-------------------|---------|-----------------------|---------------|-------|-------|--------|-------|-------|-------|-------|-------|-------|
|                   |         |                       | A375          | A549  | HA1E  | HCC515 | HEPG2 | HT29  | MCF7  | NPC   | PC3   | VCAP  |
| ER-27319          | -5.6230 | 9.99×10 <sup>-4</sup> | 0.272         | 0.055 | 0.098 | 0.101  | 0.141 | 0.005 | 0.013 | NA    | 0.034 | 0.196 |
| wortmannin        | -5.6481 | 9.57×10 <sup>-4</sup> | 0.013         | 0.009 | 0.010 | 0.057  | 0.152 | 0.182 | 0.061 | 0.533 | 0.008 | 0.004 |
| BAS-00535043      | -5.6487 | 9.56×10 <sup>-4</sup> | 0.037         | 0.136 | 0.130 | 0.014  | NA    | 0.163 | 0.008 | NA    | 0.050 | 0.149 |
| importazole       | -5.6590 | 9.38×10 <sup>-4</sup> | 0.041         | 0.332 | 0.130 | 0.143  | 0.032 | 0.033 | 0.077 | NA    | 0.021 | 0.086 |
| oligomycin-a      | -5.6651 | 9.29×10 <sup>-4</sup> | 0.040         | 0.171 | 0.063 | 0.269  | 0.027 | 0.002 | 0.257 | NA    | 0.060 | 0.001 |
| KU-55933          | -5.6755 | 9.12×10 <sup>-4</sup> | 0.041         | 0.313 | 0.032 | 0.209  | 0.011 | 0.013 | 0.094 | NA    | 0.016 | 0.156 |
| ZSTK-474          | -5.6888 | 8.92×10 <sup>-4</sup> | 0.473         | 0.037 | 0.048 | 0.024  | 0.003 | 0.038 | 0.008 | NA    | 0.168 | 0.002 |
| FCCP              | -5.7209 | 8.43×10 <sup>-4</sup> | 0.083         | 0.208 | 0.015 | 0.158  | 0.030 | 0.013 | 0.007 | NA    | 0.344 | 0.001 |
| topotecan         | -5.7377 | 8.19×10 <sup>-4</sup> | 0.005         | 0.077 | 0.021 | 0.325  | NA    | 0.117 | 0.013 | NA    | 0.010 | 0.067 |
| AG-14361          | -5.7437 | 8.11×10 <sup>-4</sup> | 0.015         | 0.174 | 0.057 | 0.167  | 0.043 | 0.038 | 0.005 | NA    | 0.039 | 0.328 |
| JAK3-Inhibitor-II | -5.7961 | 7.41×10 <sup>-4</sup> | 0.018         | 0.072 | 0.132 | 0.129  | 0.040 | 0.121 | 0.125 | NA    | 0.238 | 0.012 |
| JNK-9L            | -5.8458 | 6.80×10 <sup>-4</sup> | 0.449         | 0.090 | 0.099 | 0.073  | 0.016 | 0.007 | 0.002 | NA    | 0.022 | 0.026 |
| WY×10354          | -5.8826 | 6.38×10 <sup>-4</sup> | 0.029         | 0.010 | 0.364 | 0.073  | 0.235 | 0.048 | 0.005 | NA    | 0.005 | 0.040 |
| temsirolimus      | -5.9287 | 5.89×10 <sup>-4</sup> | 0.046         | 0.012 | 0.124 | 0.004  | 0.424 | 0.011 | 0.003 | NA    | 0.081 | 0.075 |
| SRT-1720          | -6.0061 | 5.15×10 <sup>-4</sup> | 0.104         | 0.011 | 0.019 | 0.128  | 0.025 | 0.124 | 0.027 | NA    | 0.224 | 0.171 |
| PI-103            | -6.0485 | 4.79×10 <sup>-4</sup> | 0.002         | 0.034 | 0.071 | 0.009  | 0.439 | 0.078 | 0.033 | 0.295 | 0.002 | 0.003 |
| BAPTA-AM          | -6.0675 | 4.63×10 <sup>-4</sup> | 0.060         | 0.043 | 0.049 | 0.084  | 0.024 | 0.013 | 0.018 | NA    | 0.183 | 0.320 |
| dactinomycin      | -6.1258 | 4.19×10 <sup>-4</sup> | 0.032         | 0.026 | 0.057 | 0.179  | 0.014 | 0.036 | 0.037 | NA    | 0.027 | 0.358 |

|                   |         |                        |       |       |       |       |       |       |       |       |       |       |
|-------------------|---------|------------------------|-------|-------|-------|-------|-------|-------|-------|-------|-------|-------|
| ouabain           | −6.1680 | 3.89×10 <sup>−4</sup>  | 0.019 | 0.018 | 0.166 | 0.171 | 0.013 | 0.029 | 0.181 | NA    | 0.139 | 0.062 |
| pyrvinium–pamoate | −6.2666 | 3.28×10 <sup>−4</sup>  | 0.006 | 0.045 | 0.399 | 0.054 | 0.090 | 0.053 | 0.001 | NA    | 0.025 | 0.046 |
| quiflapon         | −6.3193 | 2.99×10 <sup>−4</sup>  | 0.138 | 0.091 | 0.013 | 0.058 | 0.007 | 0.071 | 0.038 | NA    | 0.278 | 0.062 |
| TPCA–1            | −6.3316 | 2.93×10 <sup>−4</sup>  | 0.111 | 0.017 | 0.278 | 0.022 | 0.039 | 0.004 | 0.144 | NA    | 0.110 | 0.024 |
| triptolide        | −6.3683 | 2.75×10 <sup>−4</sup>  | 0.022 | 0.074 | 0.007 | 0.096 | 0.065 | 0.003 | 0.065 | NA    | 0.055 | 0.340 |
| proscillaridin    | −6.4163 | 2.52×10 <sup>−4</sup>  | 0.077 | 0.043 | 0.061 | 0.046 | 0.072 | 0.124 | 0.225 | NA    | 0.090 | 0.016 |
| XMD–16144         | −6.4485 | 2.38×10 <sup>−4</sup>  | 0.028 | 0.019 | 0.134 | 0.024 | 0.136 | 0.118 | 0.146 | NA    | 0.098 | 0.049 |
| CD–437            | −6.4545 | 2.36×10 <sup>−4</sup>  | 0.001 | 0.011 | 0.199 | 0.196 | 0.101 | 0.102 | 0.013 | NA    | 0.092 | 0.023 |
| phloretin         | −6.4999 | 2.18×10 <sup>−4</sup>  | 0.000 | 0.388 | 0.042 | 0.063 | 0.007 | 0.021 | 0.129 | NA    | 0.019 | 0.001 |
| DG–041            | −6.5020 | 2.17×10 <sup>−4</sup>  | 0.083 | 0.027 | 0.045 | 0.070 | 0.224 | 0.103 | 0.020 | NA    | 0.138 | 0.023 |
| 7b–cis            | −6.5260 | 2.08×10 <sup>−4</sup>  | 0.058 | 0.004 | 0.216 | 0.013 | 0.097 | 0.060 | 0.009 | NA    | 0.226 | 0.032 |
| JAK3–inhibitor–VI | −6.5602 | 1.96×10 <sup>−4</sup>  | 0.210 | 0.022 | 0.016 | 0.009 | 0.002 | 0.008 | 0.003 | NA    | 0.111 | 0.303 |
| PP–110            | −6.5681 | 1.93×10 <sup>−4</sup>  | 0.012 | 0.340 | 0.039 | 0.004 | 0.193 | 0.004 | 0.049 | NA    | 0.002 | 0.030 |
| camptothecin      | −6.6220 | 1.76×10 <sup>−4</sup>  | 0.005 | 0.036 | 0.056 | 0.271 | 0.130 | 0.069 | 0.001 | NA    | 0.118 | 0.007 |
| JNJ–7706621       | −6.8654 | 1.14×10 <sup>−4</sup>  | 0.037 | 0.060 | 0.091 | 0.051 | 0.109 | 0.035 | 0.017 | NA    | 0.085 | NA    |
| purvalanol–a      | −6.8751 | 1.12×10 <sup>−4</sup>  | 0.002 | 0.006 | 0.049 | 0.006 | NA    | 0.306 | 0.004 | NA    | 0.064 | 0.003 |
| perhexiline       | −6.9292 | 1.02×10 <sup>−4</sup>  | 0.016 | 0.015 | 0.114 | 0.015 | 0.073 | 0.165 | 0.173 | NA    | 0.059 | 0.025 |
| AKT–inhibitor–IV  | −7.0879 | 7.71×10 <sup>−5</sup>  | 0.002 | 0.102 | 0.127 | 0.061 | 0.146 | 0.068 | 0.014 | NA    | 0.009 | 0.105 |
| NVP–TAE684        | −7.1031 | 7.50×10 <sup>−5</sup>  | 0.003 | 0.020 | 0.327 | 0.030 | 0.040 | 0.012 | 0.012 | NA    | 0.110 | 0.035 |
| PNU–74654         | −7.1123 | 7.39×10 <sup>−5</sup>  | 0.009 | 0.079 | 0.029 | 0.291 | 0.073 | 0.061 | 0.055 | 0.111 | 0.055 | 0.053 |
| AT–7519           | −7.4105 | 4.35×10 <sup>−5</sup>  | 0.027 | 0.131 | 0.053 | 0.004 | 0.146 | 0.040 | 0.001 | NA    | 0.112 | 0.066 |
| KU–0060648        | −7.4381 | 4.14 ×10 <sup>−5</sup> | 0.001 | 0.185 | 0.050 | 0.075 | 0.110 | 0.069 | 0.024 | NA    | 0.011 | 0.049 |

|                     |         |                       |       |       |       |       |       |       |       |       |       |       |
|---------------------|---------|-----------------------|-------|-------|-------|-------|-------|-------|-------|-------|-------|-------|
| IKK-16              | -7.5068 | 3.68×10 <sup>-5</sup> | 0.100 | 0.006 | 0.016 | 0.095 | 0.271 | 0.014 | 0.001 | NA    | 0.007 | 0.032 |
| entinostat          | -7.5444 | 3.43×10 <sup>-5</sup> | 0.009 | 0.005 | 0.054 | 0.003 | 0.044 | 0.144 | 0.247 | NA    | 0.004 | 0.030 |
| terfenadine         | -7.5531 | 3.38×10 <sup>-5</sup> | 0.042 | 0.113 | 0.005 | 0.029 | 0.008 | 0.053 | 0.263 | NA    | 0.005 | 0.020 |
| mocetinostat        | -7.5922 | 3.15×10 <sup>-5</sup> | 0.105 | 0.015 | 0.110 | 0.044 | 0.005 | 0.033 | 0.191 | NA    | 0.015 | 0.029 |
| bisindolylmaleimide | -7.6039 | 3.09×10 <sup>-5</sup> | 0.011 | 0.042 | 0.133 | 0.059 | 0.036 | 0.330 | 0.000 | 0.030 | 0.027 | 0.036 |
| GDC-0941            | -7.6077 | 3.07×10 <sup>-5</sup> | 0.061 | 0.003 | 0.175 | 0.011 | 0.180 | 0.073 | 0.015 | NA    | 0.004 | 0.019 |
| TG-101348           | -7.6397 | 2.89×10 <sup>-5</sup> | 0.021 | 0.004 | 0.201 | 0.004 | 0.086 | 0.109 | 0.002 | NA    | 0.005 | 0.104 |
| alvocidib           | -7.7541 | 2.36×10 <sup>-5</sup> | 0.157 | 0.012 | 0.081 | 0.109 | 0.088 | 0.009 | 0.003 | NA    | 0.044 | 0.025 |
| SCH-79797           | -7.9198 | 1.75×10 <sup>-5</sup> | 0.055 | 0.040 | NA    | 0.086 | 0.113 | 0.014 | 0.015 | NA    | 0.001 | 0.030 |
| CCCP                | -7.9234 | 1.74×10 <sup>-5</sup> | 0.007 | 0.046 | 0.039 | 0.104 | 0.002 | 0.032 | 0.129 | NA    | 0.108 | 0.042 |
| BI-2536             | -8.2075 | 1.04×10 <sup>-5</sup> | 0.001 | 0.004 | 0.043 | 0.002 | 0.079 | 0.008 | 0.116 | NA    | 0.088 | 0.128 |
| staurosporine       | -8.2235 | 1.01×10 <sup>-5</sup> | 0.023 | 0.007 | 0.047 | 0.013 | 0.010 | 0.018 | 0.098 | 0.124 | 0.073 | 0.217 |
| NU-7441             | -8.2533 | 9.60×10 <sup>-6</sup> | 0.026 | 0.016 | 0.052 | 0.022 | 0.146 | 0.048 | 0.082 | NA    | 0.026 | 0.049 |
| CP466722            | -8.3108 | 8.66×10 <sup>-6</sup> | 0.029 | 0.006 | 0.078 | 0.197 | 0.040 | 0.007 | 0.004 | NA    | 0.080 | 0.008 |
| ZG-10               | -8.4448 | 6.78×10 <sup>-6</sup> | 0.036 | 0.009 | 0.021 | 0.056 | 0.031 | 0.024 | 0.110 | NA    | 0.147 | 0.009 |
| torin-1             | -8.5790 | 5.31×10 <sup>-6</sup> | 0.129 | 0.013 | 0.077 | 0.003 | 0.180 | 0.001 | 0.002 | NA    | 0.002 | 0.009 |
| CGP-60474           | -8.6518 | 4.65×10 <sup>-6</sup> | 0.037 | 0.132 | 0.144 | 0.023 | 0.005 | 0.014 | 0.009 | NA    | 0.025 | 0.028 |
| GSK-1059615         | -8.8764 | 3.09×10 <sup>-6</sup> | 0.001 | 0.002 | 0.091 | 0.091 | NA    | 0.003 | 0.073 | NA    | 0.002 | 0.002 |
| CHEMBL-399379       | -8.9985 | 2.47×10 <sup>-6</sup> | 0.008 | 0.078 | NA    | 0.039 | 0.044 | 0.011 | 0.024 | NA    | 0.005 | 0.051 |
| NVP-BEZ235          | -9.0566 | 2.22×10 <sup>-6</sup> | 0.001 | 0.013 | 0.013 | 0.002 | 0.112 | 0.003 | 0.014 | 0.240 | 0.008 | 0.098 |
| SB-218078           | -9.0579 | 2.22×10 <sup>-6</sup> | 0.005 | 0.012 | 0.008 | 0.075 | 0.004 | 0.005 | 0.019 | NA    | 0.031 | 0.207 |
| palbociclib         | -9.1105 | 2.01×10 <sup>-6</sup> | 0.001 | 0.011 | 0.014 | 0.010 | 0.003 | 0.004 | 0.003 | NA    | 0.003 | 0.287 |

|                         |          |                       |       |       |       |       |       |       |       |       |       |       |
|-------------------------|----------|-----------------------|-------|-------|-------|-------|-------|-------|-------|-------|-------|-------|
| tyrphostin-AG-1478      | -9.2156  | $1.67 \times 10^{-6}$ | 0.228 | 0.001 | 0.018 | 0.002 | 0.036 | 0.006 | 0.042 | NA    | 0.009 | 0.002 |
| pidorubicine            | -9.2582  | $1.54 \times 10^{-6}$ | 0.043 | 0.019 | 0.013 | 0.089 | 0.020 | 0.012 | 0.047 | NA    | 0.060 | 0.059 |
| WY-10125132             | -9.2834  | $1.47 \times 10^{-6}$ | 0.236 | 0.006 | 0.001 | 0.002 | 0.040 | 0.010 | 0.004 | NA    | 0.000 | 0.037 |
| mitoxantrone            | -9.3439  | $1.32 \times 10^{-6}$ | 0.086 | 0.007 | 0.014 | 0.137 | 0.006 | 0.009 | 0.003 | NA    | 0.063 | 0.022 |
| AZD-8055                | -9.4389  | $1.11 \times 10^{-6}$ | 0.004 | 0.005 | 0.013 | 0.016 | 0.249 | 0.012 | 0.004 | NA    | 0.002 | 0.011 |
| pirarubicin             | -9.5076  | $9.78 \times 10^{-7}$ | 0.127 | 0.019 | 0.014 | 0.005 | 0.123 | 0.022 | 0.008 | NA    | 0.007 | 0.007 |
| PIK-75                  | -9.5689  | $8.73 \times 10^{-7}$ | 0.017 | 0.079 | 0.011 | 0.020 | 0.025 | 0.004 | 0.005 | NA    | 0.047 | 0.123 |
| bisindolylmaleimid-10ix | -9.5800  | $8.55 \times 10^{-7}$ | 0.019 | 0.074 | 0.019 | 0.028 | 0.013 | 0.007 | 0.010 | NA    | 0.032 | 0.128 |
| WZ-3105                 | -9.6105  | $8.12 \times 10^{-7}$ | 0.012 | 0.024 | 0.015 | 0.028 | 0.011 | 0.035 | 0.016 | NA    | 0.078 | NA    |
| daunorubicin            | -9.7609  | $6.16 \times 10^{-7}$ | 0.051 | 0.016 | 0.027 | 0.113 | 0.008 | 0.030 | 0.014 | NA    | 0.014 | 0.043 |
| XMD-1499                | -9.9589  | $4.28 \times 10^{-7}$ | 0.031 | 0.060 | 0.114 | 0.010 | 0.016 | 0.006 | 0.002 | NA    | 0.010 | 0.050 |
| KU-0063794              | -10.0240 | $3.79 \times 10^{-7}$ | 0.032 | 0.060 | 0.022 | 0.001 | 0.111 | 0.011 | 0.048 | NA    | 0.003 | 0.007 |
| aminopurvalanol-a       | -10.0291 | $3.75 \times 10^{-7}$ | 0.079 | 0.007 | 0.084 | 0.040 | 0.013 | 0.017 | 0.048 | NA    | 0.002 | 0.005 |
| SU-11652                | -10.0756 | $3.44 \times 10^{-7}$ | 0.007 | 0.020 | 0.065 | 0.007 | NA    | 0.006 | 0.017 | NA    | 0.047 | 0.021 |
| 5-iodotubercidin        | -10.1309 | $3.11 \times 10^{-7}$ | 0.012 | 0.009 | 0.006 | 0.044 | 0.012 | 0.009 | 0.035 | NA    | 0.061 | NA    |
| A-443644                | -10.2476 | $2.52 \times 10^{-7}$ | 0.061 | 0.061 | 0.005 | 0.011 | 0.026 | 0.003 | 0.007 | NA    | 0.007 | NA    |
| IKK-2-inhibitor-V       | -10.5159 | $1.52 \times 10^{-7}$ | 0.010 | 0.017 | 0.036 | 0.003 | 0.020 | 0.023 | 0.006 | NA    | 0.130 | 0.013 |
| AS-601245               | -10.7100 | $1.06 \times 10^{-7}$ | 0.013 | 0.058 | 0.027 | 0.039 | 0.034 | 0.050 | 0.007 | NA    | 0.014 | 0.008 |
| rottlerin               | -10.8653 | $7.99 \times 10^{-8}$ | 0.013 | 0.052 | 0.010 | 0.002 | 0.005 | 0.033 | 0.020 | 0.076 | 0.065 | 0.072 |
| BX-795                  | -11.0039 | $6.18 \times 10^{-8}$ | 0.002 | 0.014 | 0.066 | 0.028 | 0.011 | 0.080 | 0.011 | NA    | 0.009 | 0.008 |
| chromomycin-a3          | -11.0634 | $5.51 \times 10^{-8}$ | 0.006 | 0.009 | 0.033 | 0.031 | 0.050 | 0.036 | 0.012 | NA    | 0.033 | 0.017 |
| niclosamide             | -11.2932 | $3.58 \times 10^{-8}$ | 0.015 | 0.078 | 0.016 | 0.003 | 0.026 | 0.002 | 0.017 | 0.133 | 0.014 | 0.005 |

|              |          |                        |       |       |       |       |       |       |       |       |       |       |
|--------------|----------|------------------------|-------|-------|-------|-------|-------|-------|-------|-------|-------|-------|
| OSI-027      | -11.4486 | $2.68 \times 10^{-8}$  | 0.019 | 0.016 | 0.039 | 0.018 | 0.011 | 0.036 | 0.044 | NA    | 0.004 | 0.019 |
| PF-562271    | -11.4753 | $2.55 \times 10^{-8}$  | 0.016 | 0.034 | 0.011 | 0.006 | 0.016 | 0.011 | 0.026 | NA    | 0.007 | NA    |
| doxorubicin  | -11.5175 | $2.35 \times 10^{-8}$  | 0.044 | 0.001 | 0.011 | 0.089 | 0.006 | 0.005 | 0.003 | NA    | 0.032 | 0.010 |
| sirolimus    | -12.4251 | $4.30 \times 10^{-9}$  | 0.007 | 0.011 | 0.029 | 0.010 | 0.001 | 0.003 | 0.007 | 0.147 | 0.018 | 0.001 |
| TGX-115      | -12.7582 | $2.33 \times 10^{-9}$  | 0.002 | 0.007 | 0.038 | 0.004 | 0.014 | 0.002 | 0.014 | NA    | 0.045 | 0.020 |
| PHA-793887   | -12.7895 | $2.19 \times 10^{-9}$  | 0.024 | 0.004 | 0.017 | 0.010 | 0.021 | 0.012 | 0.009 | NA    | 0.006 | 0.041 |
| lestaurtinib | -14.8587 | $4.14 \times 10^{-11}$ | 0.005 | 0.003 | 0.004 | 0.041 | 0.010 | 0.003 | 0.001 | NA    | 0.015 | 0.003 |
| dorsomorphin | -16.0319 | $4.44 \times 10^{-12}$ | 0.002 | 0.003 | 0.009 | 0.003 | 0.013 | 0.004 | 0.001 | NA    | 0.006 | 0.023 |

**Table S5. The recurrent relationships which significantly upregulated expression by BI-2536 treatment for 6 hours**

| Gene ID   | REC     | FDR                    | Relative rank |       |       |        |       |       |       |     |       |       |
|-----------|---------|------------------------|---------------|-------|-------|--------|-------|-------|-------|-----|-------|-------|
|           |         |                        | A375          | A549  | HA1E  | HCC515 | HEPG2 | HT29  | MCF7  | NPC | PC3   | VCAP  |
| TERF2IP   | 16.2401 | 3.00×10 <sup>-12</sup> | 0.998         | 0.991 | 0.999 | 1.000  | 0.978 | 0.997 | 1.000 | NA  | 0.998 | 0.978 |
| HBP1      | 15.1889 | 2.24×10 <sup>-11</sup> | 0.987         | 0.994 | 0.998 | 0.997  | 0.981 | 0.999 | 0.988 | NA  | 0.979 | 0.996 |
| HIST1H2BK | 14.8989 | 3.83×10 <sup>-11</sup> | 0.997         | 0.972 | 0.998 | 0.990  | 0.975 | 0.985 | 0.999 | NA  | 1.000 | 1.000 |
| GADD45A   | 14.2400 | 1.38×10 <sup>-10</sup> | 0.999         | 0.984 | 0.997 | 0.999  | 0.978 | 0.991 | 1.000 | NA  | 1.000 | 0.953 |
| NPC1      | 13.9453 | 2.44×10 <sup>-10</sup> | 0.994         | 0.994 | 0.998 | 0.961  | 0.991 | 0.993 | 0.970 | NA  | 0.999 | 0.992 |
| WDR47     | 13.8236 | 3.05×10 <sup>-10</sup> | 0.984         | 0.975 | 0.998 | 0.991  | 0.974 | 0.999 | 0.987 | NA  | 0.981 | 0.999 |
| CBX4      | 13.7357 | 3.61×10 <sup>-10</sup> | 0.995         | 0.984 | 0.996 | 0.991  | 0.994 | 0.957 | 0.995 | NA  | 0.993 | 0.979 |
| KDM3A     | 13.7106 | 3.80×10 <sup>-10</sup> | 1.000         | 1.000 | 0.979 | 1.000  | 0.992 | 1.000 | 0.924 | NA  | 1.000 | 0.994 |
| CIRBP     | 13.3293 | 7.90×10 <sup>-10</sup> | 0.998         | 0.987 | 0.995 | 0.997  | 0.932 | 0.999 | 0.998 | NA  | 0.998 | 0.970 |
| H2BFS     | 13.1784 | 1.05×10 <sup>-9</sup>  | 0.989         | 0.957 | 0.999 | 0.974  | 0.972 | 0.986 | 0.997 | NA  | 0.994 | 1.000 |
| C18orf8   | 12.7507 | 2.36×10 <sup>-9</sup>  | 0.999         | 0.989 | 0.919 | 0.996  | 0.983 | 0.988 | 0.987 | NA  | 0.994 | 0.998 |
| PHKG2     | 12.7382 | 2.42×10 <sup>-9</sup>  | 0.992         | 0.985 | 0.988 | 0.966  | 0.972 | 1.000 | 0.989 | NA  | 0.991 | 0.967 |
| GTF2B     | 12.6226 | 2.98×10 <sup>-9</sup>  | 0.970         | 0.981 | 0.991 | 0.998  | 0.951 | 0.996 | 0.992 | NA  | 0.989 | 0.981 |
| HIST1H2AC | 12.2542 | 5.93×10 <sup>-9</sup>  | 0.996         | 0.963 | 1.000 | 0.977  | 0.921 | 0.996 | 0.988 | NA  | 0.998 | 0.996 |
| DNAJB9    | 12.2188 | 6.34×10 <sup>-9</sup>  | 0.997         | 0.992 | 0.998 | 0.999  | 0.964 | 0.987 | 0.991 | NA  | 0.932 | 0.973 |
| HIST1H1C  | 11.9920 | 9.70×10 <sup>-9</sup>  | 0.991         | 0.916 | 0.994 | 0.967  | 0.975 | 0.987 | 0.999 | NA  | 1.000 | 0.994 |
| PNP       | 11.9450 | 1.06×10 <sup>-8</sup>  | 0.999         | 0.996 | 1.000 | 0.993  | 0.883 | 0.961 | 0.994 | NA  | 0.999 | 1.000 |
| HIST1H2BD | 11.9048 | 1.14×10 <sup>-8</sup>  | 0.998         | 0.968 | 0.999 | 0.989  | 0.910 | 0.993 | 1.000 | NA  | 0.974 | 0.990 |
| HIST1H3H  | 11.9023 | 1.15×10 <sup>-8</sup>  | 0.983         | 0.900 | 0.998 | 0.979  | 0.978 | 1.000 | 0.992 | NA  | 0.991 | 0.999 |

|           |         |                       |       |       |       |       |       |       |       |    |       |       |
|-----------|---------|-----------------------|-------|-------|-------|-------|-------|-------|-------|----|-------|-------|
| HIST1H2BH | 11.7332 | 1.58×10 <sup>-8</sup> | 0.970 | 0.939 | 0.999 | 0.995 | 0.937 | 0.999 | 0.994 | NA | 0.977 | 0.999 |
| IDI1      | 11.4991 | 2.44×10 <sup>-8</sup> | 0.997 | 0.994 | 0.993 | 0.986 | 0.939 | 0.982 | 0.985 | NA | 0.933 | 0.989 |
| RSRP1     | 11.4039 | 2.91×10 <sup>-8</sup> | 0.972 | 0.999 | 0.997 | 1.000 | 0.902 | 0.990 | 0.983 | NA | 0.991 | 0.961 |
| DUSP14    | 11.2537 | 3.84×10 <sup>-8</sup> | 0.999 | 1.000 | 0.995 | 0.996 | 0.944 | 0.993 | 0.979 | NA | 0.905 | 0.977 |
| NXF1      | 11.1264 | 4.89×10 <sup>-8</sup> | 0.956 | 0.987 | 0.997 | 0.992 | 0.889 | 0.990 | 0.995 | NA | 0.990 | 0.984 |
| HMGCR     | 11.1155 | 4.99×10 <sup>-8</sup> | 0.999 | 0.982 | 0.991 | 0.987 | 0.957 | 0.990 | 0.987 | NA | 0.887 | 0.999 |
| ICAM5     | 11.0418 | 5.75×10 <sup>-8</sup> | 0.954 | 0.988 | 0.994 | 0.984 | 0.998 | 0.993 | 0.974 | NA | 0.956 | 0.931 |
| RYBP      | 11.0105 | 6.10×10 <sup>-8</sup> | 0.985 | 0.985 | 0.981 | 0.981 | 0.882 | 0.988 | 0.981 | NA | 0.996 | 0.995 |
| SNAP29    | 10.8684 | 7.95×10 <sup>-8</sup> | 0.981 | 0.956 | 0.966 | 0.952 | 0.998 | 0.999 | 0.970 | NA | 0.945 | 0.994 |
| SLC25A4   | 10.8512 | 8.19×10 <sup>-8</sup> | 0.964 | 0.919 | 0.964 | 0.988 | 0.987 | 0.992 | 0.991 | NA | 0.991 | 0.965 |
| SIRT1     | 10.8486 | 8.23×10 <sup>-8</sup> | 0.957 | 0.974 | 0.987 | 0.969 | 0.947 | 0.992 | 0.968 | NA | 0.971 | 0.995 |
| MAP1LC3B  | 10.7851 | 9.20×10 <sup>-8</sup> | 0.999 | 0.953 | 0.981 | 0.982 | 0.908 | 0.978 | 0.994 | NA | 0.996 | 0.967 |
| CDKN2AIP  | 10.7635 | 9.59×10 <sup>-8</sup> | 0.980 | 0.975 | 0.992 | 0.930 | 0.989 | 0.975 | 0.973 | NA | 0.963 | 0.977 |
| HECA      | 10.7484 | 9.87×10 <sup>-8</sup> | 0.989 | 0.959 | 0.982 | 0.978 | 0.961 | 1.000 | 0.929 | NA | 0.961 | 0.996 |
| RNF103    | 10.6514 | 1.17×10 <sup>-7</sup> | 0.984 | 0.981 | 0.951 | 0.989 | 0.988 | 0.989 | 0.926 | NA | 0.993 | 0.947 |
| FDFT1     | 10.5857 | 1.33×10 <sup>-7</sup> | 0.994 | 0.941 | 0.976 | 0.971 | 0.960 | 0.987 | 0.949 | NA | 0.966 | 0.997 |
| LPIN1     | 10.5034 | 1.55×10 <sup>-7</sup> | 0.996 | 0.957 | 0.987 | 0.999 | 0.951 | 0.930 | 0.968 | NA | 0.957 | 0.993 |
| HIST2H2BE | 10.4753 | 1.63×10 <sup>-7</sup> | 0.833 | 0.976 | 0.991 | 0.983 | 0.998 | 0.971 | 0.999 | NA | 0.994 | 0.999 |
| ZNF654    | 10.4529 | 1.71×10 <sup>-7</sup> | 0.990 | 0.984 | 0.892 | 0.968 | 1.000 | 0.995 | 0.951 | NA | 0.975 | 0.982 |
| CDC34     | 10.3979 | 1.90×10 <sup>-7</sup> | 0.999 | 0.989 | 0.984 | 0.985 | 0.967 | 0.871 | 0.999 | NA | 0.968 | 0.973 |
| ALAS1     | 10.3738 | 1.99×10 <sup>-7</sup> | 0.986 | 0.934 | 0.999 | 0.959 | 0.976 | 0.968 | 0.933 | NA | 0.999 | 0.975 |
| CCNG2     | 10.3676 | 2.01×10 <sup>-7</sup> | 0.996 | 0.993 | 0.996 | 0.998 | 0.933 | 0.977 | 0.954 | NA | 0.909 | 0.975 |
| MOSPD1    | 10.3586 | 2.04×10 <sup>-7</sup> | 0.993 | 0.969 | 0.980 | 0.997 | 0.887 | 0.939 | 0.991 | NA | 0.985 | 0.991 |



|         |         |                       |       |       |       |       |       |       |       |    |       |       |
|---------|---------|-----------------------|-------|-------|-------|-------|-------|-------|-------|----|-------|-------|
| PLXNA3  | 10.2478 | 2.52×10 <sup>-7</sup> | 0.953 | 0.956 | 0.986 | 0.977 | 0.961 | 0.933 | 0.981 | NA | 0.980 | 0.993 |
| RRAGC   | 10.0364 | 3.71×10 <sup>-7</sup> | 0.958 | 0.996 | 0.999 | 0.994 | 0.936 | 0.963 | 0.971 | NA | 0.979 | 0.910 |
| RCOR1   | 9.8973  | 4.78×10 <sup>-7</sup> | 0.988 | 0.960 | 0.993 | 0.960 | 0.876 | 0.957 | 0.965 | NA | 0.997 | 1.000 |
| JUND    | 9.8370  | 5.34×10 <sup>-7</sup> | 0.919 | 0.995 | 0.940 | 0.988 | 0.896 | 0.999 | 0.965 | NA | 0.993 | 0.997 |
| CASP3   | 9.7923  | 5.81×10 <sup>-7</sup> | 0.932 | 0.995 | 0.996 | 0.963 | 0.867 | 0.992 | 0.989 | NA | 0.957 | 1.000 |
| CDK7    | 9.7474  | 6.32×10 <sup>-7</sup> | 0.964 | 0.992 | 0.823 | 0.991 | 0.956 | 0.984 | 0.997 | NA | 0.998 | 0.987 |
| CRK     | 9.7183  | 6.65×10 <sup>-7</sup> | 0.994 | 0.893 | 0.997 | 0.976 | 0.964 | 0.963 | 0.936 | NA | 0.971 | 0.985 |
| ALDOC   | 9.6805  | 7.12×10 <sup>-7</sup> | 0.992 | 0.994 | 0.792 | 0.970 | 0.979 | 0.982 | 0.997 | NA | 0.997 | 0.989 |
| SPSB3   | 9.6767  | 7.16×10 <sup>-7</sup> | 0.981 | 0.906 | 0.947 | 0.975 | 0.949 | 0.936 | 0.995 | NA | 0.990 | 0.998 |
| MAP3K3  | 9.6474  | 7.57×10 <sup>-7</sup> | 0.997 | 0.964 | 0.997 | 0.919 | 0.989 | 0.994 | 0.886 | NA | 0.993 | 0.938 |
| TMEM41B | 9.6408  | 7.66×10 <sup>-7</sup> | 0.996 | 0.908 | 0.925 | 0.957 | 0.968 | 0.971 | 0.994 | NA | 0.984 | 0.971 |
| STXBP1  | 9.6058  | 8.19×10 <sup>-7</sup> | 0.987 | 0.936 | 0.985 | 0.972 | 0.950 | 0.989 | 0.873 | NA | 0.995 | 0.985 |
| CCNL2   | 9.5882  | 8.43×10 <sup>-7</sup> | 0.939 | 0.966 | 0.990 | 0.991 | 0.824 | 0.985 | 0.996 | NA | 0.999 | 0.988 |
| BTG2    | 9.5186  | 9.58×10 <sup>-7</sup> | 0.971 | 0.968 | 0.959 | 0.959 | 0.986 | 0.947 | 0.967 | NA | 0.998 | 0.908 |
| TOPORS  | 9.5054  | 9.82×10 <sup>-7</sup> | 0.965 | 0.988 | 0.965 | 0.916 | 0.954 | 0.977 | 0.951 | NA | 0.992 | 0.951 |
| MARCH2  | 9.4427  | 1.10×10 <sup>-6</sup> | 0.979 | 0.990 | 0.953 | 0.980 | 0.918 | 0.894 | 0.992 | NA | 0.983 | 0.969 |
| LGMN    | 9.4072  | 1.17×10 <sup>-6</sup> | 0.982 | 0.921 | 1.000 | 0.998 | 0.848 | 0.988 | 0.999 | NA | 0.981 | 0.945 |
| OSBP    | 9.3824  | 1.23×10 <sup>-6</sup> | 0.994 | 0.942 | 0.990 | 0.973 | 0.913 | 0.935 | 0.997 | NA | 0.985 | 0.922 |
| GSDMB   | 9.3778  | 1.24×10 <sup>-6</sup> | 0.993 | 0.966 | 0.957 | 0.877 | 0.911 | 0.981 | 0.986 | NA | 0.988 | 0.995 |
| CSRNP2  | 9.3661  | 1.26×10 <sup>-6</sup> | 0.988 | 0.962 | 0.990 | 0.875 | 0.928 | 0.990 | 0.970 | NA | 0.951 | 0.998 |
| TNFSF9  | 9.3124  | 1.40×10 <sup>-6</sup> | 0.965 | 0.976 | 0.849 | 0.954 | 0.982 | 0.991 | 0.994 | NA | 0.973 | 0.965 |
| SOX3    | 9.2973  | 1.43×10 <sup>-6</sup> | 0.928 | 0.980 | 0.997 | 0.958 | 0.971 | 0.959 | 0.883 | NA | 0.985 | 0.983 |
| ZNF394  | 9.2765  | 1.49×10 <sup>-6</sup> | 0.967 | 0.948 | 0.961 | 0.986 | 0.948 | 0.981 | 0.993 | NA | 0.973 | 0.886 |

|           |        |                       |       |       |       |       |                  |       |       |    |       |       |
|-----------|--------|-----------------------|-------|-------|-------|-------|------------------|-------|-------|----|-------|-------|
| YPEL5     | 9.2725 | 1.50×10 <sup>-6</sup> | 0.963 | 0.963 | 0.897 | 0.966 | 0.963            | 0.998 | 0.998 | NA | 0.907 | 0.987 |
| PRDM1     | 9.2549 | 1.55×10 <sup>-6</sup> | 0.920 | 0.971 | 0.993 | 0.976 | 0.995            | 0.974 | 0.982 | NA | 0.997 | 0.837 |
| GAS6      | 9.2540 | 1.55×10 <sup>-6</sup> | 0.880 | 0.999 | 0.994 | 0.970 | 0.969            | 0.962 | 0.995 | NA | 0.988 | 0.886 |
| GUCA1A    | 9.2496 | 1.57×10 <sup>-6</sup> | 0.839 | 0.977 | 0.996 | 0.963 | 0.970            | 0.978 | 0.955 | NA | 0.982 | 0.984 |
| TPST2     | 9.2406 | 1.59×10 <sup>-6</sup> | 0.990 | 0.952 | 0.912 | 0.946 | 0.977            | 0.902 | 0.984 | NA | 0.989 | 0.985 |
| KLHL24    | 9.2308 | 1.62×10 <sup>-6</sup> | 0.966 | 0.966 | 0.929 | 0.971 | 0.962            | 0.987 | 0.871 | NA | 0.995 | 0.992 |
| TAF12     | 9.2290 | 1.63×10 <sup>-6</sup> | 0.925 | 0.910 | 0.985 | 0.975 | 0.985            | 0.899 | 0.994 | NA | 0.986 | 0.978 |
| SNRK      | 9.2238 | 1.64×10 <sup>-6</sup> | 0.993 | 0.943 | 0.995 | 0.977 | 0.967            | 0.973 | 0.834 | NA | 0.968 | 0.993 |
| TM7SF2    | 9.2044 | 1.70×10 <sup>-6</sup> | 0.952 | 0.933 | 0.999 | 0.986 | 0.840            | 0.994 | 0.997 | NA | 0.976 | 0.964 |
| NEU1      | 9.1666 | 1.82×10 <sup>-6</sup> | 0.989 | 0.998 | 0.999 | 0.996 | 0.770            | 0.983 | 0.989 | NA | 0.969 | 0.957 |
| BNIP3L    | 9.1302 | 1.94×10 <sup>-6</sup> | 1.000 | 1.000 | 0.996 | 0.982 | 0.849            | 0.992 | 0.932 | NA | 0.936 | 0.946 |
| HERPUD1   | 9.1008 | 2.05×10 <sup>-6</sup> | 0.997 | 0.998 | 0.995 | 0.998 | 0.954            | 0.979 | 0.917 | NA | 0.802 | 0.999 |
| CDKN2D    | 9.0915 | 2.08×10 <sup>-6</sup> | 0.986 | 0.964 | 0.864 | 0.978 | 0.906            | 0.981 | 0.982 | NA | 0.998 | 0.967 |
| CCNL1     | 9.0627 | 2.20×10 <sup>-6</sup> | 0.985 | 0.982 | 0.964 | 0.931 | 0.940            | 0.944 | 0.971 | NA | 0.980 | 0.920 |
| ABHD3     | 9.0491 | 2.25×10 <sup>-6</sup> | 0.993 | 0.976 | 0.993 | 0.988 | 0.746            | 0.997 | 0.983 | NA | 0.984 | 0.985 |
| ZBTB43    | 9.0132 | 2.41×10 <sup>-6</sup> | 0.949 | 0.895 | 0.912 | 0.953 | 0.984            | 0.998 | 0.986 | NA | 0.983 | 0.956 |
| DNAJB4    | 9.0081 | 2.43×10 <sup>-6</sup> | 0.983 | 0.915 | 0.974 | 0.935 | 0.897            | 0.988 | 0.964 | NA | 0.990 | 0.969 |
| HIST1H2BO | 8.9768 | 2.57×10 <sup>-6</sup> | 0.862 | 0.945 | 0.996 | 0.858 | 0.997            | 0.996 | 0.999 | NA | 0.977 | 0.991 |
| CCDC92    | 8.9699 | 2.60×10 <sup>-6</sup> | 0.994 | 0.947 | 0.968 | 0.998 | 0.9 <sup>6</sup> | 0.954 | 0.946 | NA | 0.997 | 0.899 |
| TMEM57    | 8.9189 | 2.85×10 <sup>-6</sup> | 0.926 | 0.959 | 0.976 | 0.959 | 0.982            | 0.953 | 0.964 | NA | 0.971 | 0.911 |
| DESI2     | 8.9097 | 2.91×10 <sup>-6</sup> | 0.990 | 0.993 | 0.857 | 0.975 | 0.974            | 0.975 | 0.907 | NA | 0.958 | 0.980 |
| COPE      | 8.8846 | 3.04×10 <sup>-6</sup> | 0.905 | 0.927 | 0.978 | 0.954 | 0.995            | 0.974 | 0.990 | NA | 0.933 | 0.945 |
| ZFP36     | 8.8759 | 3.09×10 <sup>-6</sup> | 0.972 | 0.957 | 1.000 | 0.974 | 0.973            | 0.843 | 0.925 | NA | 0.999 | 0.964 |

|          |        |                       |       |       |       |       |       |       |       |    |       |       |
|----------|--------|-----------------------|-------|-------|-------|-------|-------|-------|-------|----|-------|-------|
| SSR4     | 8.8455 | 3.26×10 <sup>-6</sup> | 0.811 | 0.954 | 0.992 | 0.982 | 0.950 | 0.981 | 0.992 | NA | 0.956 | 0.990 |
| DAZL     | 8.8434 | 3.28×10 <sup>-6</sup> | 0.877 | 0.986 | 0.989 | 0.956 | 0.892 | 0.944 | 0.998 | NA | 0.977 | 0.983 |
| SQLE     | 8.8405 | 3.29×10 <sup>-6</sup> | 0.975 | 0.994 | 0.983 | 0.967 | 0.896 | 0.989 | 0.983 | NA | 0.872 | 0.940 |
| TKTL1    | 8.8354 | 3.33×10 <sup>-6</sup> | 0.918 | 0.939 | 0.965 | 0.937 | 0.992 | 0.931 | 0.975 | NA | 0.952 | 0.986 |
| NOSIP    | 8.8174 | 3.44×10 <sup>-6</sup> | 0.906 | 0.994 | 0.996 | 0.926 | 0.864 | 0.999 | 0.993 | NA | 0.927 | 0.996 |
| NTAN1    | 8.8115 | 3.47×10 <sup>-6</sup> | 0.979 | 0.939 | 0.992 | 0.915 | 0.862 | 1.000 | 0.950 | NA | 0.996 | 0.966 |
| NRBP1    | 8.7694 | 3.75×10 <sup>-6</sup> | 0.955 | 0.982 | 0.968 | 0.961 | 0.975 | 0.995 | 0.927 | NA | 0.955 | 0.874 |
| ULK1     | 8.7458 | 3.92×10 <sup>-6</sup> | 0.993 | 0.873 | 0.989 | 0.985 | 0.937 | 0.986 | 0.943 | NA | 0.925 | 0.960 |
| BSG      | 8.7405 | 3.95×10 <sup>-6</sup> | 0.909 | 0.863 | 0.969 | 0.982 | 0.953 | 0.991 | 0.999 | NA | 0.968 | 0.956 |
| AKR7A3   | 8.7188 | 4.11×10 <sup>-6</sup> | 0.926 | 0.985 | 0.935 | 0.881 | 0.979 | 0.982 | 0.943 | NA | 0.999 | 0.954 |
| MGEA5    | 8.7156 | 4.14×10 <sup>-6</sup> | 0.988 | 0.989 | 0.993 | 0.950 | 0.924 | 0.997 | 0.989 | NA | 0.852 | 0.908 |
| IER5     | 8.6747 | 4.46×10 <sup>-6</sup> | 0.974 | 0.912 | 0.980 | 0.954 | 0.839 | 0.981 | 0.990 | NA | 0.995 | 0.960 |
| ASMTL    | 8.6611 | 4.57×10 <sup>-6</sup> | 0.972 | 0.974 | 0.976 | 0.985 | 0.821 | 0.983 | 0.990 | NA | 0.967 | 0.918 |
| FGD6     | 8.6278 | 4.86×10 <sup>-6</sup> | 0.987 | 0.929 | 0.994 | 0.900 | 0.996 | 0.846 | 0.946 | NA | 0.988 | 0.995 |
| PRKG1    | 8.6149 | 4.98×10 <sup>-6</sup> | 0.943 | 0.954 | 0.968 | 0.936 | 0.981 | 0.860 | 0.992 | NA | 0.965 | 0.976 |
| MICAL1   | 8.6116 | 5.01×10 <sup>-6</sup> | 0.982 | 0.932 | 0.979 | 1.000 | 0.811 | 0.974 | 0.970 | NA | 0.944 | 0.990 |
| HIST3H2A | 8.6088 | 5.03×10 <sup>-6</sup> | 0.946 | 0.997 | 0.894 | 0.946 | 0.985 | 0.994 | 0.984 | NA | 0.887 | 0.941 |
| MYO1D    | 8.6087 | 5.03×10 <sup>-6</sup> | 0.935 | 0.959 | 0.967 | 0.930 | 0.993 | 0.964 | 0.966 | NA | 0.904 | 0.952 |
| HLA-G    | 8.5964 | 5.15×10 <sup>-6</sup> | 0.935 | 0.957 | 0.977 | 0.990 | 0.828 | 0.991 | 0.985 | NA | 0.947 | 0.968 |
| TUFT1    | 8.5910 | 5.20×10 <sup>-6</sup> | 0.982 | 0.859 | 0.926 | 0.960 | 0.953 | 0.961 | 0.974 | NA | 0.992 | 0.964 |
| BRD2     | 8.5423 | 5.67×10 <sup>-6</sup> | 0.992 | 0.982 | 0.984 | 0.995 | 0.800 | 0.991 | 0.991 | NA | 0.866 | 0.982 |
| BRAP     | 8.4425 | 6.81×10 <sup>-6</sup> | 0.972 | 0.995 | 0.990 | 0.978 | 0.885 | 0.926 | 0.997 | NA | 0.980 | 0.839 |
| ELOVL4   | 8.4292 | 6.97×10 <sup>-6</sup> | 0.890 | 0.959 | 0.985 | 0.997 | 0.917 | 0.971 | 0.985 | NA | 0.886 | 0.965 |

|           |        |                       |       |       |       |       |       |       |       |    |       |       |
|-----------|--------|-----------------------|-------|-------|-------|-------|-------|-------|-------|----|-------|-------|
| GADD45B   | 8.4046 | 7.30×10 <sup>-6</sup> | 0.991 | 0.993 | 0.999 | 0.834 | 0.970 | 0.916 | 0.911 | NA | 1.000 | 0.944 |
| KIAA1033  | 8.4032 | 7.31×10 <sup>-6</sup> | 0.907 | 0.937 | 0.818 | 0.990 | 0.992 | 0.989 | 0.968 | NA | 0.974 | 0.983 |
| AKR7A2    | 8.3797 | 7.64×10 <sup>-6</sup> | 0.923 | 0.986 | 0.997 | 0.966 | 0.736 | 0.970 | 0.999 | NA | 0.999 | 0.998 |
| GABARAPL2 | 8.3707 | 7.75×10 <sup>-6</sup> | 0.991 | 0.976 | 0.918 | 0.957 | 0.877 | 0.975 | 0.976 | NA | 0.921 | 0.953 |
| MTM1      | 8.3703 | 7.76×10 <sup>-6</sup> | 0.926 | 0.970 | 0.999 | 0.966 | 0.872 | 0.967 | 0.930 | NA | 0.978 | 0.937 |
| SMC6      | 8.3667 | 7.81×10 <sup>-6</sup> | 0.885 | 0.932 | 0.931 | 0.997 | 0.973 | 0.967 | 0.981 | NA | 0.986 | 0.893 |
| CDKN1A    | 8.3665 | 7.81×10 <sup>-6</sup> | 0.999 | 0.988 | 0.979 | 0.948 | 0.889 | 0.985 | 0.959 | NA | 0.996 | 0.813 |
| FAM53C    | 8.3532 | 8.01×10 <sup>-6</sup> | 0.991 | 0.958 | 0.874 | 0.987 | 0.905 | 0.979 | 0.931 | NA | 0.992 | 0.928 |
| INSIG1    | 8.3244 | 8.45×10 <sup>-6</sup> | 0.999 | 0.997 | 1.000 | 0.988 | 0.646 | 0.991 | 0.996 | NA | 0.999 | 0.990 |
| KIAA0513  | 8.3209 | 8.50×10 <sup>-6</sup> | 0.971 | 0.932 | 0.960 | 0.981 | 0.995 | 0.991 | 0.894 | NA | 0.982 | 0.839 |
| TST       | 8.2848 | 9.07×10 <sup>-6</sup> | 0.973 | 0.890 | 0.988 | 0.964 | 0.993 | 0.924 | 0.988 | NA | 0.987 | 0.835 |
| RBM6      | 8.2823 | 9.11×10 <sup>-6</sup> | 0.947 | 0.862 | 0.846 | 0.984 | 0.986 | 0.954 | 1.000 | NA | 0.983 | 0.980 |
| MSMO1     | 8.2821 | 9.12×10 <sup>-6</sup> | 0.993 | 0.987 | 0.998 | 0.973 | 0.762 | 0.990 | 0.995 | NA | 0.938 | 0.921 |
| SREBF2    | 8.2083 | 1.04×10 <sup>-5</sup> | 0.984 | 0.952 | 0.995 | 0.916 | 0.920 | 0.967 | 0.908 | NA | 0.919 | 0.963 |
| ZNF10     | 8.2019 | 1.05×10 <sup>-5</sup> | 0.975 | 0.956 | 0.998 | 0.968 | 0.801 | 0.973 | 0.904 | NA | 0.963 | 0.998 |
| BNIP3     | 8.1718 | 1.11×10 <sup>-5</sup> | 0.997 | 0.985 | 0.998 | 0.992 | 0.901 | 0.768 | 0.987 | NA | 0.985 | 0.928 |
| WIPI1     | 8.1474 | 1.16×10 <sup>-5</sup> | 0.966 | 0.968 | 0.895 | 0.985 | 0.949 | 0.997 | 0.817 | NA | 0.992 | 0.957 |
| MTMR14    | 8.0993 | 1.27×10 <sup>-5</sup> | 0.960 | 0.978 | 0.973 | 0.993 | 0.999 | 0.844 | 0.928 | NA | 0.881 | 0.963 |
| PI4KA     | 8.0819 | 1.31×10 <sup>-5</sup> | 0.986 | 0.883 | 0.968 | 0.996 | 0.896 | 0.992 | 0.954 | NA | 0.916 | 0.921 |
| NAA10     | 8.0655 | 1.35×10 <sup>-5</sup> | 0.965 | 0.971 | 0.974 | 0.880 | 0.990 | 0.919 | 0.891 | NA | 0.995 | 0.925 |
| UBE2A     | 8.0554 | 1.37×10 <sup>-5</sup> | 1.000 | 0.988 | 0.986 | 0.771 | 0.979 | 0.982 | 0.932 | NA | 0.997 | 0.892 |
| NRBF2     | 8.0451 | 1.40×10 <sup>-5</sup> | 0.963 | 0.970 | 0.991 | 0.989 | 0.756 | 0.976 | 0.968 | NA | 0.990 | 0.924 |
| SLC9A6    | 8.0420 | 1.40×10 <sup>-5</sup> | 0.915 | 0.934 | 0.970 | 0.949 | 0.943 | 0.956 | 0.896 | NA | 0.986 | 0.952 |

|           |        |                       |       |       |       |       |       |       |       |    |       |       |
|-----------|--------|-----------------------|-------|-------|-------|-------|-------|-------|-------|----|-------|-------|
| HIST1H2AM | 8.0210 | 1.46×10 <sup>-5</sup> | 0.946 | 0.917 | 0.965 | 0.927 | 0.996 | 0.995 | 0.878 | NA | 0.891 | 0.989 |
| EAF2      | 7.9897 | 1.54×10 <sup>-5</sup> | 0.999 | 0.926 | 0.828 | 0.990 | 0.988 | 0.851 | 0.961 | NA | 0.975 | 0.993 |
| ING1      | 7.9619 | 1.63×10 <sup>-5</sup> | 0.932 | 0.999 | 0.991 | 0.973 | 0.815 | 0.955 | 0.979 | NA | 0.996 | 0.866 |
| IP6K2     | 7.9401 | 1.69×10 <sup>-5</sup> | 0.976 | 0.999 | 0.926 | 0.954 | 0.836 | 0.987 | 0.975 | NA | 0.922 | 0.921 |
| TMEM66    | 7.9247 | 1.74×10 <sup>-5</sup> | 0.967 | 0.958 | 0.976 | 0.970 | 0.852 | 0.997 | 0.942 | NA | 0.930 | 0.899 |
| DNM1L     | 7.9116 | 1.78×10 <sup>-5</sup> | 0.979 | 0.927 | 0.931 | 0.950 | 0.944 | 0.999 | 0.865 | NA | 0.936 | 0.956 |
| MAGEB2    | 7.8556 | 1.97×10 <sup>-5</sup> | 0.941 | 0.988 | 0.944 | 0.977 | 0.916 | 0.800 | 0.976 | NA | 0.984 | 0.962 |
| NDUFA2    | 7.8244 | 2.08×10 <sup>-5</sup> | 0.983 | 0.924 | 0.987 | 0.991 | 0.965 | 0.903 | 0.973 | NA | 0.933 | 0.823 |
| CCDC93    | 7.8005 | 2.17×10 <sup>-5</sup> | 0.982 | 0.999 | 0.994 | 0.975 | 0.947 | 0.864 | 0.938 | NA | 0.906 | 0.870 |
| NARF      | 7.7904 | 2.21×10 <sup>-5</sup> | 0.961 | 0.998 | 0.989 | 0.955 | 0.848 | 0.953 | 0.974 | NA | 0.871 | 0.925 |
| TCEB2     | 7.7892 | 2.22×10 <sup>-5</sup> | 0.952 | 0.965 | 0.982 | 0.935 | 0.978 | 0.929 | 0.987 | NA | 0.853 | 0.892 |
| HEXIM1    | 7.7837 | 2.24×10 <sup>-5</sup> | 0.894 | 0.918 | 0.965 | 0.989 | 0.955 | 0.992 | 0.974 | NA | 0.967 | 0.821 |
| B3GALT2   | 7.7827 | 2.24×10 <sup>-5</sup> | 0.881 | 0.968 | 0.842 | 0.984 | 0.945 | 0.962 | 0.971 | NA | 0.965 | 0.955 |
| MVD       | 7.7672 | 2.31×10 <sup>-5</sup> | 0.984 | 0.987 | 0.995 | 0.977 | 0.889 | 0.968 | 0.936 | NA | 0.816 | 0.923 |
| DAAM1     | 7.7440 | 2.40×10 <sup>-5</sup> | 0.951 | 0.999 | 0.869 | 0.891 | 0.939 | 0.999 | 0.982 | NA | 0.860 | 0.982 |
| RHCE      | 7.7381 | 2.43×10 <sup>-5</sup> | 0.936 | 0.812 | 0.942 | 0.970 | 0.955 | 0.948 | 0.994 | NA | 0.939 | 0.973 |
| HAUS3     | 7.7228 | 2.49×10 <sup>-5</sup> | 0.956 | 0.946 | 0.988 | 0.969 | 0.970 | 0.932 | 0.853 | NA | 0.897 | 0.950 |
| BTG1      | 7.7101 | 2.55×10 <sup>-5</sup> | 0.956 | 0.936 | 0.904 | 0.931 | 0.882 | 0.995 | 0.947 | NA | 0.927 | 0.980 |
| TRIM36    | 7.6987 | 2.60×10 <sup>-5</sup> | 0.761 | 0.926 | 0.975 | 0.990 | 0.971 | 0.907 | 0.996 | NA | 0.997 | 0.953 |
| CD9       | 7.6942 | 2.62×10 <sup>-5</sup> | 0.978 | 0.964 | 0.952 | 0.968 | 0.949 | 0.865 | 0.868 | NA | 0.944 | 0.969 |
| SNX16     | 7.6891 | 2.65×10 <sup>-5</sup> | 0.855 | 0.984 | 0.948 | 0.963 | 0.893 | 0.979 | 0.859 | NA | 0.991 | 0.991 |
| NFKBIE    | 7.6712 | 2.74×10 <sup>-5</sup> | 0.987 | 0.951 | 0.898 | 0.783 | 0.995 | 0.955 | 0.927 | NA | 0.975 | 0.997 |
| ARHGEF7   | 7.6677 | 2.75×10 <sup>-5</sup> | 0.929 | 0.999 | 0.987 | 0.942 | 0.944 | 0.830 | 0.949 | NA | 0.890 | 0.988 |

|          |        |                       |        |       |                  |       |       |       |       |    |       |       |
|----------|--------|-----------------------|--------|-------|------------------|-------|-------|-------|-------|----|-------|-------|
| SIRT2    | 7.6648 | 2.77×10 <sup>-5</sup> | 0.917  | 0.982 | 0.950            | 0.914 | 0.979 | 0.966 | 0.923 | NA | 0.967 | 0.856 |
| RSRC2    | 7.6383 | 2.90×10 <sup>-5</sup> | 0.987  | 0.913 | 0.996            | 0.994 | 0.872 | 0.963 | 0.968 | NA | 0.845 | 0.917 |
| AHDC1    | 7.6336 | 2.93×10 <sup>-5</sup> | 0.990  | 0.781 | 0.952            | 0.924 | 0.980 | 0.925 | 0.980 | NA | 0.943 | 0.986 |
| PI4K2A   | 7.6246 | 2.97×10 <sup>-5</sup> | 0.846  | 0.995 | 0.983            | 0.956 | 0.822 | 0.960 | 0.981 | NA | 0.975 | 0.938 |
| RBBP6    | 7.6226 | 2.98×10 <sup>-5</sup> | 0.975  | 0.956 | 0.820            | 0.995 | 0.886 | 0.981 | 0.972 | NA | 0.971 | 0.898 |
| DMTF1    | 7.6167 | 3.02×10 <sup>-5</sup> | 0.993  | 0.959 | 0.902            | 0.974 | 0.962 | 0.888 | 0.800 | NA | 0.980 | 0.998 |
| AZIN1    | 7.5691 | 3.28×10 <sup>-5</sup> | 0.886  | 0.902 | 0.951            | 0.948 | 0.968 | 0.959 | 0.952 | NA | 0.916 | 0.952 |
| GDI1     | 7.5321 | 3.51×10 <sup>-5</sup> | 0.975  | 0.898 | 0.994            | 0.856 | 0.960 | 0.955 | 0.956 | NA | 0.847 | 0.998 |
| ATP6V1G1 | 7.5164 | 3.61×10 <sup>-5</sup> | 0.949  | 0.961 | 0.983            | 0.990 | 0.732 | 0.995 | 0.885 | NA | 0.984 | 0.980 |
| AKAP17A  | 7.4719 | 3.90×10 <sup>-5</sup> | 0.956  | 0.926 | 0.971            | 0.848 | 0.996 | 0.863 | 0.939 | NA | 0.959 | 0.969 |
| LIPG     | 7.4619 | 3.97×10 <sup>-5</sup> | 0.930  | 0.936 | 0.941            | 0.999 | 0.763 | 0.943 | 0.999 | NA | 0.937 | 0.992 |
| CALCOCO1 | 7.4488 | 4.06×10 <sup>-5</sup> | 0.866  | 0.858 | 0.997            | 0.993 | 0.904 | 0.958 | 0.990 | NA | 0.931 | 0.929 |
| ZNF268   | 7.4210 | 4.27×10 <sup>-5</sup> | 0.952  | 0.968 | 0.978            | 0.995 | 0.971 | 0.798 | 0.900 | NA | 0.948 | 0.914 |
| PAFAH2   | 7.4068 | 4.38×10 <sup>-5</sup> | 0.8007 | 0.982 | 0.993            | 0.920 | 0.952 | 0.836 | 0.976 | NA | 0.982 | 0.982 |
| ATPIF1   | 7.4009 | 4.42×10 <sup>-5</sup> | 0.939  | 0.980 | 0.903            | 0.997 | 0.774 | 0.985 | 0.959 | NA | 0.963 | 0.927 |
| FOXO3    | 7.3958 | 4.47×10 <sup>-5</sup> | 0.934  | 0.788 | 0.831            | 0.983 | 0.918 | 0.996 | 0.998 | NA | 0.994 | 0.992 |
| SAT1     | 7.3722 | 4.66×10 <sup>-5</sup> | 0.954  | 0.972 | 0.996            | 0.932 | 0.826 | 0.926 | 0.972 | NA | 0.911 | 0.924 |
| AKIRIN1  | 7.3713 | 4.66×10 <sup>-5</sup> | 0.993  | 0.957 | 0.921            | 0.940 | 0.843 | 0.984 | 0.948 | NA | 0.991 | 0.838 |
| SDC3     | 7.3464 | 4.87×10 <sup>-5</sup> | 0.969  | 0.941 | 0.788            | 0.895 | 0.989 | 0.915 | 0.962 | NA | 0.971 | 0.987 |
| BLK      | 7.3320 | 5.00×10 <sup>-5</sup> | 0.918  | 0.956 | 0.927            | 0.867 | 0.866 | 0.987 | 0.991 | NA | 0.946 | 0.947 |
| MAN2A1   | 7.3073 | 5.22×10 <sup>-5</sup> | 0.867  | 0.857 | 0.971            | 0.797 | 0.956 | 0.993 | 0.994 | NA | 0.994 | 0.987 |
| FADS3    | 7.2913 | 5.37×10 <sup>-5</sup> | 0.985  | 0.921 | 0.913            | 0.950 | 0.917 | 0.985 | 0.843 | NA | 0.895 | 0.990 |
| TRNAU1AP | 7.2819 | 5.46×10 <sup>-5</sup> | 0.995  | 0.998 | 0.9 <sup>7</sup> | 0.800 | 0.997 | 0.863 | 0.917 | NA | 0.969 | 0.963 |

|         |        |                       |       |       |       |       |       |       |        |    |       |       |
|---------|--------|-----------------------|-------|-------|-------|-------|-------|-------|--------|----|-------|-------|
| CAP1    | 7.2554 | 5.73×10 <sup>-5</sup> | 0.982 | 0.960 | 0.750 | 0.922 | 0.867 | 0.997 | 0.954  | NA | 0.997 | 0.985 |
| PLEKHF2 | 7.2418 | 5.87×10 <sup>-5</sup> | 0.957 | 0.985 | 0.958 | 0.914 | 0.965 | 0.967 | 0.872  | NA | 0.811 | 0.965 |
| TXNIP   | 7.2057 | 6.25×10 <sup>-5</sup> | 0.910 | 0.958 | 0.982 | 0.958 | 0.954 | 0.797 | 0.962  | NA | 0.968 | 0.902 |
| CDC37L1 | 7.2037 | 6.27×10 <sup>-5</sup> | 0.981 | 0.978 | 0.978 | 0.847 | 0.821 | 0.958 | 0.988  | NA | 0.994 | 0.852 |
| VAMP1   | 7.1987 | 6.32×10 <sup>-5</sup> | 0.974 | 0.946 | 0.888 | 0.839 | 0.998 | 0.876 | 0.957  | NA | 0.974 | 0.935 |
| COX6A1  | 7.1799 | 6.54×10 <sup>-5</sup> | 0.984 | 0.997 | 0.950 | 0.969 | 0.738 | 0.952 | 0.993  | NA | 0.959 | 0.861 |
| ATP2A3  | 7.1751 | 6.60×10 <sup>-5</sup> | 0.961 | 0.995 | 0.965 | 0.859 | 0.991 | 0.850 | 0.888  | NA | 0.960 | 0.915 |
| DHCR7   | 7.1741 | 6.61×10 <sup>-5</sup> | 0.944 | 0.981 | 0.870 | 0.960 | 0.710 | 0.977 | 0.988  | NA | 0.988 | 0.994 |
| CBFA2T3 | 7.1694 | 6.67×10 <sup>-5</sup> | 0.953 | 0.991 | 0.977 | 0.949 | 0.977 | 0.879 | 0.875  | NA | 0.813 | 0.972 |
| RIPK1   | 7.1575 | 6.81×10 <sup>-5</sup> | 0.993 | 0.989 | 0.924 | 0.813 | 0.985 | 0.790 | 0.981  | NA | 0.962 | 0.957 |
| ZNF223  | 7.1433 | 6.99×10 <sup>-5</sup> | 0.757 | 0.952 | 0.963 | 0.957 | 0.913 | 0.910 | 0.976  | NA | 0.990 | 0.971 |
| PMAIP1  | 7.1198 | 7.29×10 <sup>-5</sup> | 0.992 | 0.987 | 0.999 | 0.999 | 0.927 | 0.996 | 0.774  | NA | 0.985 | 0.749 |
| CAAP1   | 7.1108 | 7.41×10 <sup>-5</sup> | 0.997 | 0.917 | 0.986 | 0.883 | 0.894 | 0.793 | 0.983  | NA | 0.945 | 0.980 |
| JUNB    | 6.9943 | 9.10×10 <sup>-5</sup> | 0.959 | 0.958 | 0.898 | 0.876 | 0.888 | 0.992 | 0.884  | NA | 0.980 | 0.913 |
| IFRD1   | 6.9879 | 9.20×10 <sup>-5</sup> | 0.998 | 0.962 | 0.998 | 0.983 | 0.683 | 0.980 | 0.951  | NA | 0.846 | 0.992 |
| PINK1   | 6.9872 | 9.21×10 <sup>-5</sup> | 0.826 | 0.908 | 0.938 | 0.995 | 0.865 | 0.967 | 0.982  | NA | 0.917 | 0.953 |
| SLC26A6 | 6.9755 | 9.41×10 <sup>-5</sup> | 0.730 | 0.990 | 0.864 | 0.923 | 0.993 | 0.989 | 0.963  | NA | 0.937 | 0.981 |
| DSTN    | 6.9639 | 9.60×10 <sup>-5</sup> | 0.973 | 0.875 | 0.883 | 0.989 | 0.938 | 0.978 | 0.9044 | NA | 0.924 | 0.878 |
| ANKRD46 | 6.9480 | 9.87×10 <sup>-5</sup> | 0.988 | 0.930 | 0.914 | 0.804 | 0.957 | 0.917 | 0.977  | NA | 0.972 | 0.886 |
| SERTAD3 | 6.9416 | 9.98×10 <sup>-5</sup> | 0.979 | 0.984 | 0.949 | 0.829 | 0.951 | 0.953 | 0.756  | NA | 0.986 | 0.973 |
| KLF13   | 6.9193 | 1.04×10 <sup>-4</sup> | 0.864 | 0.851 | 0.942 | 0.991 | 0.973 | 0.811 | 0.993  | NA | 0.990 | 0.932 |
| DCAF10  | 6.9079 | 1.06×10 <sup>-4</sup> | 0.996 | 0.921 | 0.956 | 0.965 | 0.970 | 0.811 | 0.984  | NA | 0.902 | 0.837 |
| MARCH3  | 6.8646 | 1.15×10 <sup>-4</sup> | 0.933 | 0.889 | 0.961 | 0.817 | 0.839 | 0.944 | 0.993  | NA | 0.971 | 0.986 |

|          |        |                       |       |       |       |       |       |       |       |    |       |       |
|----------|--------|-----------------------|-------|-------|-------|-------|-------|-------|-------|----|-------|-------|
| ZNF211   | 6.8564 | 1.16×10 <sup>-4</sup> | 0.907 | 0.992 | 0.988 | 0.954 | 0.869 | 0.869 | 0.997 | NA | 0.953 | 0.805 |
| FDPS     | 6.8496 | 1.18×10 <sup>-4</sup> | 0.900 | 0.976 | 0.993 | 0.981 | 0.803 | 0.967 | 0.978 | NA | 0.796 | 0.948 |
| PIKFYVE  | 6.8405 | 1.19×10 <sup>-4</sup> | 0.971 | 0.890 | 0.975 | 0.964 | 0.868 | 0.937 | 0.935 | NA | 0.858 | 0.922 |
| CTH      | 6.8290 | 1.22×10 <sup>-4</sup> | 0.994 | 0.997 | 0.989 | 0.989 | 0.534 | 0.983 | 0.994 | NA | 0.981 | 0.981 |
| HDAC5    | 6.8008 | 1.28×10 <sup>-4</sup> | 0.797 | 0.975 | 0.951 | 0.948 | 0.927 | 0.962 | 0.938 | NA | 0.884 | 0.935 |
| NDUFS7   | 6.7838 | 1.32×10 <sup>-4</sup> | 0.808 | 0.967 | 0.925 | 0.982 | 0.945 | 0.926 | 0.993 | NA | 0.921 | 0.850 |
| MTERFD1  | 6.7743 | 1.35×10 <sup>-4</sup> | 0.994 | 0.997 | 0.895 | 0.983 | 0.998 | 0.795 | 0.942 | NA | 0.829 | 0.890 |
| POU5F1P4 | 6.7701 | 1.36×10 <sup>-4</sup> | 0.924 | 0.836 | 0.980 | 0.919 | 0.927 | 0.980 | 0.980 | NA | 0.826 | 0.943 |
| AP3S1    | 6.7566 | 1.39×10 <sup>-4</sup> | 0.960 | 0.935 | 0.760 | 0.992 | 0.939 | 0.952 | 0.907 | NA | 0.946 | 0.925 |
| KCTD13   | 6.7357 | 1.44×10 <sup>-4</sup> | 0.986 | 0.820 | 0.982 | 0.907 | 0.948 | 0.841 | 0.981 | NA | 0.875 | 0.970 |
| ZNF124   | 6.7355 | 1.44×10 <sup>-4</sup> | 0.944 | 0.854 | 0.956 | 0.931 | 0.873 | 0.983 | 0.936 | NA | 0.938 | 0.885 |
| H2AFV    | 6.7241 | 1.47×10 <sup>-4</sup> | 0.974 | 0.956 | 0.839 | 0.964 | 0.983 | 0.863 | 0.940 | NA | 0.882 | 0.901 |
| ATP6V0D1 | 6.7200 | 1.48×10 <sup>-4</sup> | 0.991 | 0.962 | 0.861 | 0.935 | 0.857 | 0.905 | 0.963 | NA | 0.912 | 0.911 |
| GNRH1    | 6.7186 | 1.48×10 <sup>-4</sup> | 0.845 | 0.975 | 0.919 | 0.963 | 0.930 | 0.977 | 0.977 | NA | 0.977 | 0.752 |
| LSS      | 6.7003 | 1.53×10 <sup>-4</sup> | 0.970 | 0.997 | 0.908 | 0.991 | 0.748 | 0.935 | 0.985 | NA | 0.803 | 0.986 |
| DDIT3    | 6.6897 | 1.56×10 <sup>-4</sup> | 0.879 | 0.994 | 0.995 | 0.999 | 0.775 | 0.843 | 0.887 | NA | 0.970 | 0.969 |
| RIOK3    | 6.6770 | 1.60×10 <sup>-4</sup> | 0.968 | 0.828 | 0.838 | 0.964 | 0.948 | 0.990 | 0.924 | NA | 0.931 | 0.905 |
| CDH13    | 6.6469 | 1.68×10 <sup>-4</sup> | 0.905 | 0.984 | 0.884 | 0.909 | 0.929 | 0.923 | 0.992 | NA | 0.989 | 0.781 |
| RLF      | 6.6442 | 1.69×10 <sup>-4</sup> | 0.991 | 0.971 | 0.961 | 0.987 | 0.990 | 0.846 | 0.895 | NA | 0.961 | 0.715 |
| LIN37    | 6.6438 | 1.69×10 <sup>-4</sup> | 0.887 | 0.979 | 0.978 | 0.947 | 0.977 | 0.893 | 0.973 | NA | 0.786 | 0.876 |
| HIST1H1T | 6.6381 | 1.71×10 <sup>-4</sup> | 0.916 | 0.877 | 0.973 | 0.928 | 0.997 | 0.998 | 0.789 | NA | 0.911 | 0.905 |
| TUBB2A   | 6.6378 | 1.71×10 <sup>-4</sup> | 0.887 | 0.994 | 0.765 | 0.932 | 0.915 | 0.932 | 0.986 | NA | 0.921 | 0.963 |
| MSTN     | 6.6303 | 1.73×10 <sup>-4</sup> | 0.801 | 0.922 | 0.977 | 0.988 | 0.858 | 0.929 | 0.984 | NA | 0.889 | 0.942 |



|         |        |                       |       |       |       |       |       |       |       |    |       |       |
|---------|--------|-----------------------|-------|-------|-------|-------|-------|-------|-------|----|-------|-------|
| PIM2    | 6.6119 | 1.79×10 <sup>-4</sup> | 0.890 | 0.909 | 0.951 | 0.971 | 0.907 | 0.844 | 0.953 | NA | 0.966 | 0.886 |
| ATG2B   | 6.6085 | 1.80×10 <sup>-4</sup> | 0.852 | 0.893 | 0.991 | 0.992 | 0.799 | 0.995 | 0.966 | NA | 0.959 | 0.846 |
| WDR44   | 6.6009 | 1.83×10 <sup>-4</sup> | 0.959 | 0.979 | 0.956 | 0.944 | 0.929 | 0.800 | 0.911 | NA | 0.965 | 0.840 |
| NOTCH1  | 6.6006 | 1.83×10 <sup>-4</sup> | 0.990 | 0.999 | 0.995 | 0.971 | 0.565 | 0.989 | 0.881 | NA | 0.992 | 0.996 |
| DYNC1H1 | 6.5793 | 1.90×10 <sup>-4</sup> | 0.940 | 0.924 | 0.915 | 0.954 | 0.839 | 0.966 | 0.894 | NA | 0.912 | 0.926 |
| FAM50A  | 6.5753 | 1.91×10 <sup>-4</sup> | 0.934 | 0.990 | 0.926 | 0.744 | 0.987 | 0.966 | 0.946 | NA | 0.854 | 0.943 |
| RUNDC3B | 6.5613 | 1.96×10 <sup>-4</sup> | 0.934 | 0.991 | 0.832 | 0.911 | 0.815 | 0.996 | 0.861 | NA | 0.993 | 0.948 |
| TUBB3   | 6.5575 | 1.97×10 <sup>-4</sup> | 0.974 | 0.967 | 0.658 | 0.930 | 0.896 | 0.952 | 0.995 | NA | 0.955 | 0.986 |
| HLA-E   | 6.5557 | 1.98×10 <sup>-4</sup> | 0.998 | 0.993 | 0.990 | 0.997 | 0.592 | 0.946 | 0.985 | NA | 0.937 | 0.912 |
| NPPC    | 6.5544 | 1.98×10 <sup>-4</sup> | 0.792 | 0.835 | 0.974 | 0.926 | 0.925 | 0.977 | 0.942 | NA | 0.946 | 0.959 |
| GNAI2   | 6.5431 | 2.02×10 <sup>-4</sup> | 1.000 | 0.804 | 0.993 | 0.966 | 0.808 | 0.999 | 0.866 | NA | 0.995 | 0.858 |
| IFI6    | 6.5374 | 2.04×10 <sup>-4</sup> | 0.942 | 0.967 | 0.963 | 0.901 | 0.834 | 0.942 | 0.927 | NA | 0.949 | 0.840 |
| CDC37   | 6.5366 | 2.05×10 <sup>-4</sup> | 0.705 | 0.920 | 0.957 | 0.984 | 0.988 | 0.865 | 0.989 | NA | 0.992 | 0.895 |
| NTRK1   | 6.5224 | 2.10×10 <sup>-4</sup> | 0.829 | 0.975 | 0.852 | 0.781 | 0.947 | 0.972 | 0.995 | NA | 0.960 | 0.969 |
| GUK1    | 6.5175 | 2.12×10 <sup>-4</sup> | 0.989 | 0.986 | 0.821 | 0.909 | 0.822 | 0.988 | 0.981 | NA | 0.899 | 0.876 |
| ANKRD10 | 6.4986 | 2.19×10 <sup>-4</sup> | 0.998 | 0.996 | 0.930 | 0.827 | 0.867 | 0.937 | 0.999 | NA | 0.814 | 0.900 |
| BLZF1   | 6.4949 | 2.20×10 <sup>-4</sup> | 0.859 | 0.995 | 0.956 | 0.798 | 0.940 | 0.964 | 0.925 | NA | 0.964 | 0.863 |
| ABCA7   | 6.4868 | 2.23×10 <sup>-4</sup> | 0.990 | 0.992 | 0.965 | 0.991 | 0.620 | 0.870 | 0.984 | NA | 0.911 | 0.999 |
| TSPYL2  | 6.4653 | 2.32×10 <sup>-4</sup> | 0.981 | 0.899 | 0.989 | 0.951 | 0.973 | 0.962 | 0.786 | NA | 0.828 | 0.894 |
| CPT2    | 6.4597 | 2.34×10 <sup>-4</sup> | 0.818 | 0.987 | 0.922 | 0.933 | 0.981 | 0.983 | 0.965 | NA | 0.988 | 0.706 |
| TPP1    | 6.4587 | 2.34×10 <sup>-4</sup> | 0.848 | 0.868 | 0.963 | 0.910 | 0.947 | 0.876 | 0.981 | NA | 0.953 | 0.901 |
| RNF38   | 6.4473 | 2.39×10 <sup>-4</sup> | 0.953 | 0.892 | 0.980 | 0.986 | 0.928 | 0.914 | 0.740 | NA | 0.906 | 0.962 |
| ZCCHC6  | 6.4284 | 2.47×10 <sup>-4</sup> | 0.954 | 0.938 | 0.855 | 0.985 | 0.895 | 0.935 | 0.935 | NA | 0.935 | 0.811 |

|            |        |                       |       |       |       |       |       |       |       |    |       |       |
|------------|--------|-----------------------|-------|-------|-------|-------|-------|-------|-------|----|-------|-------|
| ABHD17A    | 6.4158 | 2.53×10 <sup>-4</sup> | 0.976 | 0.915 | 0.873 | 0.967 | 0.837 | 0.794 | 0.984 | NA | 0.967 | 0.937 |
| KLK5       | 6.4076 | 2.56×10 <sup>-4</sup> | 0.937 | 0.886 | 0.941 | 0.903 | 0.859 | 0.934 | 0.980 | NA | 0.908 | 0.885 |
| ROGDI      | 6.3892 | 2.65×10 <sup>-4</sup> | 0.921 | 0.697 | 0.972 | 0.942 | 0.997 | 0.909 | 0.991 | NA | 0.937 | 0.898 |
| ZNF331     | 6.3830 | 2.68×10 <sup>-4</sup> | 0.984 | 0.891 | 0.981 | 0.801 | 0.844 | 0.933 | 0.959 | NA | 0.889 | 0.959 |
| STARD5     | 6.3758 | 2.71×10 <sup>-4</sup> | 0.917 | 0.933 | 0.910 | 0.934 | 0.959 | 0.905 | 0.908 | NA | 0.978 | 0.790 |
| CYP46A1    | 6.3737 | 2.72×10 <sup>-4</sup> | 0.945 | 0.867 | 0.915 | 0.879 | 0.948 | 0.955 | 0.896 | NA | 0.876 | 0.944 |
| HSPA6      | 6.3712 | 2.73×10 <sup>-4</sup> | 0.916 | 0.954 | 0.973 | 0.983 | 0.704 | 0.954 | 0.862 | NA | 0.996 | 0.918 |
| ATP6V0A1   | 6.3627 | 2.77×10 <sup>-4</sup> | 0.971 | 0.905 | 0.932 | 0.941 | 0.802 | 0.859 | 0.968 | NA | 0.932 | 0.921 |
| DYNC1LI1   | 6.3549 | 2.81×10 <sup>-4</sup> | 0.997 | 0.979 | 0.985 | 0.969 | 0.936 | 0.948 | 0.842 | NA | 0.860 | 0.735 |
| PPP1R15A   | 6.3534 | 2.82×10 <sup>-4</sup> | 0.911 | 0.894 | 0.975 | 0.978 | 0.673 | 0.933 | 0.993 | NA | 0.942 | 0.965 |
| KDM7A      | 6.3390 | 2.89×10 <sup>-4</sup> | 0.944 | 0.954 | 0.963 | 0.977 | 0.889 | 0.873 | 0.953 | NA | 0.873 | 0.803 |
| ST6GALNAC5 | 6.3298 | 2.94×10 <sup>-4</sup> | 0.834 | 0.943 | 0.987 | 0.813 | 0.949 | 0.892 | 0.988 | NA | 0.943 | 0.879 |
| ARSA       | 6.3161 | 3.01×10 <sup>-4</sup> | 0.851 | 0.954 | 0.997 | 0.973 | 0.971 | 0.938 | 0.978 | NA | 0.980 | 0.635 |
| SLC30A1    | 6.2963 | 3.11×10 <sup>-4</sup> | 0.989 | 0.937 | 0.810 | 0.962 | 0.896 | 0.826 | 0.927 | NA | 0.925 | 0.949 |
| TNNI3      | 6.2776 | 3.22×10 <sup>-4</sup> | 0.948 | 0.689 | 0.970 | 0.941 | 0.990 | 0.796 | 0.998 | NA | 0.963 | 0.958 |
| CTSK       | 6.2717 | 3.25×10 <sup>-4</sup> | 0.926 | 0.984 | 0.892 | 0.976 | 0.767 | 0.972 | 0.886 | NA | 0.994 | 0.830 |
| HADHB      | 6.2409 | 3.43×10 <sup>-4</sup> | 0.930 | 0.928 | 0.868 | 0.914 | 0.876 | 0.994 | 0.873 | NA | 0.856 | 0.962 |
| C12orf5    | 6.2238 | 3.54×10 <sup>-4</sup> | 0.946 | 0.965 | 0.992 | 0.701 | 0.856 | 0.848 | 0.957 | NA | 0.983 | 0.987 |
| NR4A3      | 6.2231 | 3.54×10 <sup>-4</sup> | 0.976 | 0.969 | 0.961 | 0.851 | 0.873 | 0.972 | 0.767 | NA | 0.973 | 0.872 |
| SQSTM1     | 6.2022 | 3.67×10 <sup>-4</sup> | 0.810 | 0.990 | 1.000 | 0.963 | 0.865 | 0.919 | 0.757 | NA | 0.923 | 0.992 |
| DNAJC6     | 6.1788 | 3.82×10 <sup>-4</sup> | 0.482 | 0.989 | 0.974 | 0.999 | 0.985 | 0.963 | 0.993 | NA | 0.970 | 0.997 |
| STK3       | 6.1732 | 3.86×10 <sup>-4</sup> | 0.784 | 0.888 | 0.959 | 0.979 | 0.980 | 0.829 | 0.890 | NA | 0.941 | 0.949 |
| CPSF3L     | 6.1715 | 3.87×10 <sup>-4</sup> | 0.948 | 0.874 | 0.978 | 0.993 | 0.676 | 0.872 | 1.000 | NA | 0.995 | 0.893 |

|          |        |                       |       |       |       |       |       |       |       |    |       |       |
|----------|--------|-----------------------|-------|-------|-------|-------|-------|-------|-------|----|-------|-------|
| ERO1LB   | 6.1630 | 3.93×10 <sup>-4</sup> | 0.650 | 0.968 | 0.995 | 0.983 | 0.858 | 0.930 | 0.961 | NA | 0.984 | 0.906 |
| FOXN3    | 6.1569 | 3.97×10 <sup>-4</sup> | 0.734 | 0.908 | 0.909 | 0.997 | 0.737 | 0.998 | 0.984 | NA | 0.979 | 0.982 |
| PELI1    | 6.1507 | 4.01×10 <sup>-4</sup> | 0.831 | 0.914 | 0.976 | 0.955 | 0.757 | 0.967 | 0.979 | NA | 0.948 | 0.872 |
| VAMP3    | 6.1504 | 4.01×10 <sup>-4</sup> | 0.934 | 0.896 | 0.908 | 0.963 | 0.913 | 0.749 | 0.974 | NA | 0.912 | 0.946 |
| APBB3    | 6.1354 | 4.12×10 <sup>-4</sup> | 0.900 | 0.896 | 0.983 | 0.947 | 0.831 | 0.935 | 0.860 | NA | 0.907 | 0.920 |
| ZBTB5    | 6.1275 | 4.18×10 <sup>-4</sup> | 0.977 | 0.966 | 0.777 | 0.949 | 0.825 | 0.965 | 0.906 | NA | 0.872 | 0.955 |
| FGL2     | 6.1274 | 4.18×10 <sup>-4</sup> | 0.883 | 0.930 | 0.967 | 0.898 | 0.910 | 0.834 | 0.977 | NA | 0.892 | 0.883 |
| YIPF3    | 6.1223 | 4.22×10 <sup>-4</sup> | 0.845 | 0.798 | 0.925 | 0.913 | 0.974 | 0.948 | 0.988 | NA | 0.888 | 0.903 |
| SS18L1   | 6.0974 | 4.40×10 <sup>-4</sup> | 0.966 | 0.799 | 0.968 | 0.950 | 0.923 | 0.896 | 0.889 | NA | 0.968 | 0.820 |
| HSD17B12 | 6.0879 | 4.47×10 <sup>-4</sup> | 0.776 | 0.990 | 0.928 | 0.984 | 0.676 | 0.963 | 0.991 | NA | 0.957 | 0.954 |
| DNAJB6   | 6.0777 | 4.55×10 <sup>-4</sup> | 0.958 | 0.973 | 0.710 | 0.902 | 0.945 | 0.979 | 0.893 | NA | 0.948 | 0.882 |
| IGF2R    | 6.0642 | 4.66×10 <sup>-4</sup> | 0.899 | 0.873 | 0.842 | 0.970 | 0.674 | 0.984 | 0.988 | NA | 0.995 | 0.984 |
| HLA-F    | 6.0576 | 4.71×10 <sup>-4</sup> | 0.836 | 0.965 | 0.971 | 0.945 | 0.834 | 0.801 | 0.964 | NA | 0.882 | 0.976 |
| NNAT     | 6.0423 | 4.84×10 <sup>-4</sup> | 0.761 | 0.861 | 0.946 | 0.933 | 0.931 | 0.990 | 0.907 | NA | 0.867 | 0.975 |
| BCL10    | 6.0296 | 4.95×10 <sup>-4</sup> | 0.970 | 0.923 | 0.936 | 0.834 | 0.909 | 0.957 | 0.782 | NA | 0.931 | 0.921 |
| INSR     | 6.0235 | 5.00×10 <sup>-4</sup> | 0.917 | 0.859 | 0.892 | 0.916 | 0.965 | 0.827 | 0.925 | NA | 0.984 | 0.871 |
| ATP6V1D  | 5.9886 | 5.31×10 <sup>-4</sup> | 0.941 | 0.638 | 0.934 | 0.962 | 0.938 | 0.996 | 0.938 | NA | 0.943 | 0.906 |
| FEM1C    | 5.9869 | 5.33×10 <sup>-4</sup> | 0.940 | 0.991 | 0.945 | 0.910 | 0.900 | 0.772 | 0.941 | NA | 0.779 | 0.986 |
| PSAP     | 5.9868 | 5.33×10 <sup>-4</sup> | 0.853 | 0.924 | 0.982 | 0.995 | 0.713 | 0.959 | 0.995 | NA | 0.908 | 0.847 |
| NR5A2    | 5.9868 | 5.33×10 <sup>-4</sup> | 0.964 | 0.909 | 0.924 | 0.765 | 0.959 | 0.929 | 0.838 | NA | 0.994 | 0.876 |
| TOB2     | 5.9832 | 5.36×10 <sup>-4</sup> | 0.922 | 0.900 | 0.873 | 0.728 | 0.928 | 0.956 | 0.909 | NA | 0.969 | 0.977 |
| PTTG1IP  | 5.9551 | 5.62×10 <sup>-4</sup> | 0.958 | 0.958 | 0.931 | 0.924 | 0.677 | 0.951 | 0.902 | NA | 0.878 | 0.992 |
| NAB2     | 5.9539 | 5.64×10 <sup>-4</sup> | 0.979 | 0.955 | 0.937 | 0.876 | 0.998 | 0.952 | 0.611 | NA | 0.918 | 0.978 |

|          |        |                       |       |       |       |       |       |       |                  |    |       |       |
|----------|--------|-----------------------|-------|-------|-------|-------|-------|-------|------------------|----|-------|-------|
| CCDC121  | 5.9537 | 5.64×10 <sup>-4</sup> | 0.763 | 0.987 | 0.955 | 0.935 | 0.970 | 0.885 | 0.928            | NA | 0.968 | 0.771 |
| WDR78    | 5.9447 | 5.73×10 <sup>-4</sup> | 0.920 | 0.904 | 0.865 | 0.946 | 0.832 | 0.855 | 0.990            | NA | 0.885 | 0.938 |
| GAL3ST4  | 5.9431 | 5.74×10 <sup>-4</sup> | 0.635 | 0.930 | 0.971 | 0.973 | 0.854 | 0.993 | 0.942            | NA | 0.915 | 0.977 |
| ANKRD11  | 5.9370 | 5.80×10 <sup>-4</sup> | 0.995 | 0.858 | 0.837 | 0.784 | 0.961 | 0.975 | 0.886            | NA | 0.969 | 0.883 |
| SSBP3    | 5.9337 | 5.84×10 <sup>-4</sup> | 0.862 | 0.730 | 0.956 | 0.857 | 0.978 | 0.973 | 0.976            | NA | 0.866 | 0.960 |
| EGR4     | 5.9268 | 5.91×10 <sup>-4</sup> | 0.890 | 0.983 | 0.751 | 0.990 | 0.773 | 0.922 | 0.890            | NA | 0.978 | 0.983 |
| TIPARP   | 5.9017 | 6.17×10 <sup>-4</sup> | 0.881 | 0.993 | 0.999 | 0.753 | 0.993 | 0.615 | 0.996            | NA | 0.991 | 0.995 |
| EPHX1    | 5.8957 | 6.24×10 <sup>-4</sup> | 0.995 | 0.828 | 0.936 | 0.983 | 0.688 | 0.956 | 0.953            | NA | 0.918 | 0.903 |
| GOLGB1   | 5.8940 | 6.26×10 <sup>-4</sup> | 0.819 | 0.991 | 0.906 | 0.982 | 0.991 | 0.913 | 0.891            | NA | 0.772 | 0.876 |
| SUGP1    | 5.8895 | 6.31×10 <sup>-4</sup> | 0.910 | 0.989 | 0.912 | 0.883 | 0.847 | 0.946 | 0.9 <sup>6</sup> | NA | 0.811 | 0.920 |
| IER2     | 5.8879 | 6.32×10 <sup>-4</sup> | 0.995 | 0.975 | 0.607 | 0.882 | 0.979 | 0.929 | 0.932            | NA | 0.991 | 0.902 |
| ARHGAP33 | 5.8763 | 6.45×10 <sup>-4</sup> | 0.942 | 0.816 | 0.972 | 0.870 | 0.996 | 0.828 | 0.980            | NA | 0.778 | 0.957 |
| ACOT7    | 5.8722 | 6.50×10 <sup>-4</sup> | 0.635 | 0.898 | 0.963 | 0.996 | 0.788 | 0.999 | 0.936            | NA | 0.989 | 0.983 |
| NEB      | 5.8591 | 6.65×10 <sup>-4</sup> | 0.959 | 0.916 | 0.989 | 0.934 | 0.980 | 0.847 | 0.978            | NA | 0.850 | 0.697 |
| KDR      | 5.8192 | 7.12×10 <sup>-4</sup> | 0.879 | 0.792 | 0.990 | 0.689 | 0.960 | 0.963 | 0.961            | NA | 0.991 | 0.925 |
| AJAP1    | 5.8168 | 7.15×10 <sup>-4</sup> | 0.808 | 0.934 | 0.975 | 0.746 | 1.000 | 0.913 | 0.980            | NA | 0.894 | 0.879 |
| PRKAR2B  | 5.8070 | 7.27×10 <sup>-4</sup> | 0.858 | 0.995 | 0.897 | 0.929 | 0.806 | 0.815 | 0.915            | NA | 0.935 | 0.962 |
| HMGCS1   | 5.7782 | 7.64×10 <sup>-4</sup> | 0.856 | 0.992 | 0.886 | 0.960 | 0.840 | 0.913 | 0.937            | NA | 0.739 | 0.994 |
| CLDN14   | 5.7747 | 7.69×10 <sup>-4</sup> | 0.906 | 0.804 | 0.904 | 0.897 | 0.986 | 0.910 | 0.922            | NA | 0.958 | 0.814 |
| INPP5K   | 5.7676 | 7.78×10 <sup>-4</sup> | 0.580 | 0.941 | 0.969 | 0.967 | 0.871 | 0.988 | 0.969            | NA | 0.972 | 0.918 |
| SSTR4    | 5.7653 | 7.81×10 <sup>-4</sup> | 0.792 | 0.943 | 0.776 | 0.979 | 0.914 | 0.842 | 0.954            | NA | 0.965 | 0.946 |
| EZR      | 5.7651 | 7.82×10 <sup>-4</sup> | 0.951 | 0.767 | 0.961 | 0.831 | 0.981 | 0.916 | 0.864            | NA | 0.854 | 0.984 |
| NR4A1    | 5.7445 | 8.10×10 <sup>-4</sup> | 0.928 | 0.999 | 0.997 | 0.788 | 0.811 | 0.948 | 0.758            | NA | 0.985 | 0.905 |

|         |        |                       |       |       |       |       |       |       |       |    |       |       |
|---------|--------|-----------------------|-------|-------|-------|-------|-------|-------|-------|----|-------|-------|
| FAM8A1  | 5.7301 | 8.30×10 <sup>-4</sup> | 0.960 | 0.931 | 0.982 | 0.968 | 0.705 | 0.902 | 0.812 | NA | 0.995 | 0.862 |
| COL11A1 | 5.7264 | 8.35×10 <sup>-4</sup> | 0.664 | 0.899 | 0.917 | 0.919 | 0.963 | 0.980 | 0.977 | NA | 0.932 | 0.870 |
| WDR19   | 5.7214 | 8.43×10 <sup>-4</sup> | 0.830 | 0.943 | 0.993 | 0.990 | 0.709 | 0.922 | 0.997 | NA | 0.785 | 0.955 |
| LAMP2   | 5.7205 | 8.44×10 <sup>-4</sup> | 0.857 | 0.978 | 0.985 | 0.664 | 0.815 | 0.979 | 0.967 | NA | 0.969 | 0.916 |
| CYLD    | 5.7079 | 8.63×10 <sup>-4</sup> | 0.805 | 0.935 | 0.928 | 0.814 | 0.920 | 0.991 | 0.934 | NA | 0.917 | 0.842 |
| IRF1    | 5.7050 | 8.67×10 <sup>-4</sup> | 0.919 | 0.974 | 0.844 | 0.865 | 0.894 | 0.970 | 0.825 | NA | 0.979 | 0.817 |
| SIGIRR  | 5.7000 | 8.75×10 <sup>-4</sup> | 0.976 | 0.880 | 0.892 | 0.956 | 0.862 | 0.831 | 0.824 | NA | 0.991 | 0.873 |
| NGLY1   | 5.6970 | 8.79×10 <sup>-4</sup> | 0.997 | 0.878 | 0.989 | 0.969 | 0.685 | 0.865 | 0.829 | NA | 0.970 | 0.934 |
| AVIL    | 5.6856 | 8.97×10 <sup>-4</sup> | 0.758 | 0.919 | 0.839 | 0.946 | 0.788 | 0.998 | 0.976 | NA | 0.964 | 0.908 |
| UBR2    | 5.6851 | 8.97×10 <sup>-4</sup> | 0.974 | 0.657 | 0.955 | 0.941 | 0.900 | 0.998 | 0.859 | NA | 0.867 | 0.966 |
| NFIL3   | 5.6837 | 8.99×10 <sup>-4</sup> | 0.715 | 0.991 | 0.978 | 0.874 | 0.957 | 0.993 | 0.675 | NA | 0.987 | 0.970 |
| ISG15   | 5.6815 | 9.03×10 <sup>-4</sup> | 0.961 | 1.000 | 0.876 | 0.929 | 0.931 | 0.928 | 0.806 | NA | 0.862 | 0.790 |
| RECK    | 5.6796 | 9.06×10 <sup>-4</sup> | 0.957 | 0.814 | 0.690 | 0.880 | 0.980 | 0.960 | 0.948 | NA | 0.927 | 0.949 |
| CYB5R1  | 5.6744 | 9.14×10 <sup>-4</sup> | 0.982 | 0.940 | 0.944 | 0.932 | 0.566 | 0.966 | 0.996 | NA | 0.946 | 0.885 |
| STX12   | 5.6720 | 9.18×10 <sup>-4</sup> | 0.968 | 0.910 | 0.977 | 0.975 | 0.917 | 0.868 | 0.973 | NA | 0.985 | 0.579 |
| TTC13   | 5.6715 | 9.19×10 <sup>-4</sup> | 0.931 | 0.943 | 0.993 | 0.922 | 0.796 | 0.822 | 0.993 | NA | 0.993 | 0.714 |
| L1TD1   | 5.6709 | 9.19×10 <sup>-4</sup> | 0.943 | 0.881 | 0.972 | 0.871 | 0.938 | 0.738 | 0.926 | NA | 0.878 | 0.935 |
| RRAD    | 5.6614 | 9.35×10 <sup>-4</sup> | 0.884 | 0.958 | 0.982 | 0.948 | 0.699 | 0.787 | 0.966 | NA | 0.904 | 0.974 |
| PIK3CA  | 5.6580 | 9.40×10 <sup>-4</sup> | 0.870 | 0.952 | 0.932 | 0.760 | 0.986 | 0.919 | 0.905 | NA | 0.900 | 0.853 |
| C7orf43 | 5.6551 | 9.45×10 <sup>-4</sup> | 0.954 | 0.906 | 0.980 | 0.973 | 0.872 | 0.959 | 0.932 | NA | 0.891 | 0.646 |
| ARC     | 5.6483 | 9.56×10 <sup>-4</sup> | 0.973 | 0.943 | 0.878 | 0.972 | 0.603 | 0.860 | 0.989 | NA | 0.970 | 0.945 |
| SNTG2   | 5.6465 | 9.59×10 <sup>-4</sup> | 0.640 | 0.924 | 0.954 | 0.973 | 0.807 | 0.990 | 0.966 | NA | 0.897 | 0.967 |
| FAM89B  | 5.6433 | 9.65×10 <sup>-4</sup> | 0.987 | 0.916 | 0.914 | 0.966 | 0.676 | 0.838 | 0.982 | NA | 0.996 | 0.831 |

|        |        |                       |       |       |       |       |       |       |       |    |       |       |
|--------|--------|-----------------------|-------|-------|-------|-------|-------|-------|-------|----|-------|-------|
| TLE4   | 5.6358 | 9.77×10 <sup>-4</sup> | 0.872 | 0.764 | 0.872 | 0.994 | 0.912 | 0.966 | 0.967 | NA | 0.815 | 0.914 |
| PER3   | 5.6345 | 9.79×10 <sup>-4</sup> | 0.903 | 0.800 | 0.947 | 0.908 | 0.958 | 0.974 | 0.961 | NA | 0.990 | 0.665 |
| PCMT1  | 5.6336 | 9.80×10 <sup>-4</sup> | 0.996 | 1.000 | 0.993 | 0.966 | 0.760 | 0.875 | 0.623 | NA | 0.952 | 0.972 |
| CHI3L1 | 5.6336 | 9.80×10 <sup>-4</sup> | 0.947 | 0.899 | 0.930 | 0.961 | 0.757 | 0.904 | 0.910 | NA | 0.879 | 0.878 |
| ATG4B  | 5.6311 | 9.85×10 <sup>-4</sup> | 0.989 | 0.909 | 0.899 | 0.951 | 0.618 | 0.882 | 0.966 | NA | 0.973 | 0.931 |
| BRD4   | 5.6309 | 9.85×10 <sup>-4</sup> | 0.836 | 0.803 | 0.889 | 0.833 | 0.944 | 0.974 | 0.966 | NA | 0.852 | 0.972 |
| IZUMO4 | 5.6247 | 9.96×10 <sup>-4</sup> | 0.829 | 0.917 | 0.761 | 0.879 | 0.958 | 0.971 | 0.999 | NA | 0.870 | 0.889 |

**Table S6. The recurrent relationships which significantly upregulated expression by BI-2536 treatment for 24 hours**

| Gene ID   | REC     | FDR                   | Relative rank |       |       |        |       |       |       |     |       |       |
|-----------|---------|-----------------------|---------------|-------|-------|--------|-------|-------|-------|-----|-------|-------|
|           |         |                       | A375          | A549  | HA1E  | HCC515 | HEPG2 | HT29  | MCF7  | NPC | PC3   | VCAP  |
| IGF2R     | 13.7713 | 1.11×10 <sup>-9</sup> | 0.996         | 0.993 | 0.996 | 0.988  | NA    | 0.999 | 0.998 | NA  | 0.987 | 0.976 |
| INSIG1    | 12.3069 | 1.54×10 <sup>-8</sup> | 0.997         | 0.964 | 0.995 | 0.982  | NA    | 0.988 | 0.983 | NA  | 0.998 | 0.992 |
| HIST2H2BE | 11.1286 | 1.25×10 <sup>-7</sup> | 0.999         | 0.967 | 0.968 | 0.994  | NA    | 0.983 | 0.999 | NA  | 0.998 | 0.951 |
| TIPARP    | 10.4700 | 4.21×10 <sup>-7</sup> | 0.988         | 0.937 | 0.989 | 0.997  | NA    | 0.978 | 0.958 | NA  | 0.984 | 1.000 |
| KIAA0226  | 10.4680 | 4.22×10 <sup>-7</sup> | 0.990         | 0.961 | 0.989 | 0.966  | NA    | 0.997 | 0.994 | NA  | 0.979 | 0.953 |
| ATP6V0D1  | 10.4679 | 4.22×10 <sup>-7</sup> | 0.997         | 0.991 | 0.976 | 0.987  | NA    | 0.995 | 0.980 | NA  | 0.973 | 0.931 |
| SLC25A4   | 10.3960 | 4.77×10 <sup>-7</sup> | 0.998         | 0.995 | 0.957 | 0.923  | NA    | 1.000 | 0.999 | NA  | 0.993 | 0.963 |
| HECA      | 10.2932 | 5.76×10 <sup>-7</sup> | 0.970         | 0.953 | 0.982 | 0.996  | NA    | 0.988 | 0.991 | NA  | 0.981 | 0.959 |
| STXBP1    | 10.1438 | 7.49×10 <sup>-7</sup> | 0.994         | 0.934 | 0.971 | 0.996  | NA    | 0.964 | 0.996 | NA  | 0.974 | 0.986 |
| HMGCR     | 10.1028 | 8.07×10 <sup>-7</sup> | 1.000         | 0.973 | 0.988 | 0.994  | NA    | 0.945 | 0.931 | NA  | 0.988 | 0.992 |
| RRAGC     | 9.9389  | 1.08×10 <sup>-6</sup> | 0.991         | 0.994 | 0.994 | 0.945  | NA    | 0.980 | 0.989 | NA  | 0.924 | 0.986 |
| TERF2IP   | 9.8642  | 1.23×10 <sup>-6</sup> | 0.999         | 0.999 | 0.997 | 1.000  | NA    | 0.829 | 0.999 | NA  | 0.996 | 0.992 |
| MAP1LC3B  | 9.7135  | 1.59×10 <sup>-6</sup> | 0.976         | 0.931 | 0.956 | 0.992  | NA    | 0.989 | 0.993 | NA  | 0.993 | 0.959 |
| CYTH2     | 9.6553  | 1.77×10 <sup>-6</sup> | 0.978         | 1.000 | 0.988 | 0.974  | NA    | 0.977 | 0.998 | NA  | 0.886 | 0.989 |
| NPC1      | 9.6164  | 1.89×10 <sup>-6</sup> | 0.959         | 0.933 | 1.000 | 0.999  | NA    | 0.968 | 0.989 | NA  | 0.954 | 0.979 |
| GDI1      | 9.1983  | 3.93×10 <sup>-6</sup> | 0.990         | 0.918 | 0.999 | 0.956  | NA    | 0.979 | 0.993 | NA  | 0.995 | 0.927 |
| NOSIP     | 9.1067  | 4.60×10 <sup>-6</sup> | 0.948         | 0.992 | 0.996 | 0.956  | NA    | 1.000 | 0.977 | NA  | 0.890 | 0.993 |
| CIRBP     | 9.0908  | 4.73×10 <sup>-6</sup> | 0.971         | 0.945 | 0.997 | 0.923  | NA    | 0.962 | 0.973 | NA  | 0.994 | 0.981 |

|           |        |                       |       |       |       |       |    |       |       |    |       |       |
|-----------|--------|-----------------------|-------|-------|-------|-------|----|-------|-------|----|-------|-------|
| LPIN1     | 8.9545 | 6.00×10 <sup>-6</sup> | 0.970 | 0.920 | 0.991 | 0.983 | NA | 0.967 | 0.943 | NA | 0.972 | 0.992 |
| HIST1H2AC | 8.9521 | 6.03×10 <sup>-6</sup> | 0.998 | 0.980 | 0.858 | 0.980 | NA | 0.972 | 0.994 | NA | 0.981 | 0.978 |
| MGEA5     | 8.8075 | 7.78×10 <sup>-6</sup> | 0.969 | 0.952 | 0.992 | 0.998 | NA | 0.995 | 0.982 | NA | 1.000 | 0.845 |
| PLCG2     | 8.7748 | 8.24×10 <sup>-6</sup> | 0.968 | 0.963 | 0.972 | 0.980 | NA | 0.965 | 0.964 | NA | 0.948 | 0.960 |
| MAP3K3    | 8.7279 | 8.96×10 <sup>-6</sup> | 0.954 | 0.860 | 0.998 | 0.996 | NA | 0.996 | 0.968 | NA | 0.952 | 1.000 |
| WDR19     | 8.7037 | 9.35×10 <sup>-6</sup> | 0.945 | 0.952 | 0.989 | 0.995 | NA | 0.963 | 0.993 | NA | 0.889 | 0.994 |
| WDR47     | 8.6201 | 1.08×10 <sup>-5</sup> | 0.996 | 0.984 | 0.932 | 0.949 | NA | 0.991 | 0.869 | NA | 0.995 | 0.997 |
| POR       | 8.5963 | 1.13×10 <sup>-5</sup> | 0.973 | 0.990 | 0.949 | 0.970 | NA | 0.956 | 0.989 | NA | 0.937 | 0.944 |
| PI4K2A    | 8.4417 | 1.47×10 <sup>-5</sup> | 0.980 | 0.825 | 0.988 | 0.991 | NA | 0.948 | 0.992 | NA | 0.981 | 0.999 |
| H2BFS     | 8.4247 | 1.52×10 <sup>-5</sup> | 0.997 | 0.959 | 0.857 | 0.964 | NA | 0.955 | 0.993 | NA | 0.980 | 0.993 |
| HIST1H2BD | 8.3869 | 1.62×10 <sup>-5</sup> | 1.000 | 0.938 | 0.901 | 0.984 | NA | 0.975 | 0.991 | NA | 0.979 | 0.924 |
| NXF1      | 8.3454 | 1.73×10 <sup>-5</sup> | 0.927 | 0.963 | 0.966 | 0.950 | NA | 0.995 | 0.938 | NA | 0.995 | 0.952 |
| EZR       | 8.2707 | 1.97×10 <sup>-5</sup> | 0.972 | 0.962 | 0.972 | 0.955 | NA | 0.891 | 0.956 | NA | 0.988 | 0.983 |
| FIG4      | 8.2261 | 2.13×10 <sup>-5</sup> | 0.969 | 0.908 | 0.989 | 0.985 | NA | 0.952 | 0.892 | NA | 0.985 | 0.997 |
| NTRK1     | 8.1747 | 2.33×10 <sup>-5</sup> | 0.956 | 0.964 | 0.878 | 0.995 | NA | 0.922 | 0.987 | NA | 0.985 | 0.985 |
| HIST1H2BK | 8.1549 | 2.41×10 <sup>-5</sup> | 0.997 | 0.947 | 0.916 | 0.959 | NA | 0.988 | 0.983 | NA | 0.976 | 0.904 |
| HIST1H3H  | 8.1100 | 2.61×10 <sup>-5</sup> | 0.999 | 0.898 | 0.856 | 0.984 | NA | 0.951 | 0.997 | NA | 0.990 | 0.996 |
| DNAJC6    | 8.0968 | 2.66×10 <sup>-5</sup> | 0.977 | 0.895 | 0.956 | 0.951 | NA | 0.965 | 0.984 | NA | 0.990 | 0.944 |
| SPG7      | 8.0367 | 2.96×10 <sup>-5</sup> | 0.998 | 0.889 | 0.982 | 0.982 | NA | 0.936 | 0.977 | NA | 0.958 | 0.934 |
| ABCA5     | 7.9990 | 3.15×10 <sup>-5</sup> | 0.920 | 0.940 | 0.982 | 0.994 | NA | 0.993 | 0.986 | NA | 0.988 | 0.854 |
| RBM6      | 7.9398 | 3.48×10 <sup>-5</sup> | 0.976 | 0.843 | 0.985 | 0.977 | NA | 0.995 | 1.000 | NA | 1.000 | 0.880 |
| PPP2R5A   | 7.9225 | 3.59×10 <sup>-5</sup> | 0.995 | 0.924 | 0.994 | 0.888 | NA | 0.997 | 0.883 | NA | 0.999 | 0.970 |
| SERINC1   | 7.8676 | 3.94×10 <sup>-5</sup> | 0.980 | 0.869 | 0.970 | 0.991 | NA | 0.985 | 0.985 | NA | 0.977 | 0.886 |



|          |        |                       |       |       |       |       |    |       |       |    |       |       |
|----------|--------|-----------------------|-------|-------|-------|-------|----|-------|-------|----|-------|-------|
| KDM3A    | 7.8263 | 4.23×10 <sup>-5</sup> | 0.999 | 0.921 | 0.994 | 0.973 | NA | 0.975 | 0.834 | NA | 0.952 | 0.994 |
| KIAA0513 | 7.7974 | 4.45×10 <sup>-5</sup> | 0.978 | 0.838 | 0.975 | 0.990 | NA | 0.988 | 0.988 | NA | 0.998 | 0.886 |
| ABCC10   | 7.7706 | 4.65×10 <sup>-5</sup> | 0.979 | 0.967 | 0.989 | 0.872 | NA | 0.891 | 0.998 | NA | 0.972 | 0.965 |
| FOXO3    | 7.7130 | 5.13×10 <sup>-5</sup> | 0.924 | 0.806 | 0.999 | 0.989 | NA | 0.992 | 0.984 | NA | 0.942 | 0.999 |
| PLEKHO2  | 7.6947 | 5.29×10 <sup>-5</sup> | 0.823 | 0.989 | 0.998 | 0.992 | NA | 0.942 | 0.955 | NA | 0.948 | 0.981 |
| CALCOCO1 | 7.6928 | 5.31×10 <sup>-5</sup> | 0.990 | 0.882 | 0.970 | 0.952 | NA | 0.970 | 0.992 | NA | 0.873 | 0.995 |
| AKR7A2   | 7.6793 | 5.43×10 <sup>-5</sup> | 0.999 | 0.741 | 1.000 | 0.970 | NA | 0.994 | 0.991 | NA | 0.999 | 0.954 |
| GLG1     | 7.5870 | 6.39×10 <sup>-5</sup> | 0.978 | 0.998 | 0.944 | 0.921 | NA | 0.875 | 0.992 | NA | 0.960 | 0.943 |
| AGTR2    | 7.5756 | 6.52×10 <sup>-5</sup> | 0.988 | 0.984 | 0.868 | 0.946 | NA | 0.991 | 0.893 | NA | 0.981 | 0.960 |
| BTG1     | 7.5275 | 7.10×10 <sup>-5</sup> | 0.985 | 0.975 | 0.910 | 0.957 | NA | 0.899 | 0.957 | NA | 0.997 | 0.922 |
| ENAH     | 7.5014 | 7.43×10 <sup>-5</sup> | 0.975 | 0.981 | 0.963 | 0.856 | NA | 0.963 | 0.998 | NA | 0.945 | 0.919 |
| ZCCHC14  | 7.4844 | 7.66×10 <sup>-5</sup> | 0.994 | 0.985 | 0.993 | 0.988 | NA | 0.941 | 0.971 | NA | 0.869 | 0.862 |
| IDI1     | 7.4831 | 7.67×10 <sup>-5</sup> | 0.995 | 0.916 | 0.997 | 0.992 | NA | 0.922 | 0.857 | NA | 0.960 | 0.961 |
| TPP1     | 7.4672 | 7.89×10 <sup>-5</sup> | 0.965 | 0.948 | 0.934 | 0.943 | NA | 0.987 | 0.962 | NA | 0.957 | 0.897 |
| KTN1     | 7.4588 | 8.02×10 <sup>-5</sup> | 0.975 | 0.938 | 0.996 | 0.863 | NA | 0.973 | 0.996 | NA | 0.888 | 0.969 |
| RCOR1    | 7.4444 | 8.21×10 <sup>-5</sup> | 0.984 | 0.971 | 0.981 | 0.986 | NA | 0.994 | 0.995 | NA | 0.933 | 0.767 |
| PLXNA3   | 7.4422 | 8.24×10 <sup>-5</sup> | 0.939 | 0.936 | 0.986 | 0.964 | NA | 0.986 | 0.990 | NA | 0.970 | 0.828 |
| TOB2     | 7.4086 | 8.75×10 <sup>-5</sup> | 0.965 | 0.959 | 0.885 | 0.950 | NA | 0.986 | 0.897 | NA | 0.997 | 0.950 |
| MTSS1    | 7.3927 | 8.98×10 <sup>-5</sup> | 0.988 | 0.987 | 0.942 | 0.876 | NA | 0.909 | 0.978 | NA | 0.970 | 0.936 |
| KLHL24   | 7.3293 | 1.00×10 <sup>-4</sup> | 0.928 | 0.848 | 0.985 | 0.980 | NA | 0.958 | 0.938 | NA | 0.978 | 0.966 |
| ARL8B    | 7.3125 | 1.03×10 <sup>-4</sup> | 0.957 | 0.799 | 0.945 | 0.963 | NA | 0.990 | 0.973 | NA | 0.982 | 0.976 |
| SC5D     | 7.3052 | 1.04×10 <sup>-4</sup> | 0.957 | 0.968 | 0.957 | 0.993 | NA | 0.974 | 0.967 | NA | 0.939 | 0.825 |
| HIST1H1C | 7.2882 | 1.07×10 <sup>-4</sup> | 0.998 | 0.955 | 0.864 | 0.917 | NA | 0.935 | 0.982 | NA | 0.999 | 0.925 |

|         |        |                       |       |       |       |       |    |       |       |    |       |       |
|---------|--------|-----------------------|-------|-------|-------|-------|----|-------|-------|----|-------|-------|
| RSRP1   | 7.2519 | 1.14×10 <sup>-4</sup> | 0.988 | 0.927 | 0.981 | 0.922 | NA | 0.974 | 0.988 | NA | 0.993 | 0.806 |
| CASP9   | 7.2484 | 1.15×10 <sup>-4</sup> | 0.901 | 0.806 | 0.986 | 0.989 | NA | 0.932 | 0.999 | NA | 0.976 | 0.989 |
| FAM117A | 7.2414 | 1.16×10 <sup>-4</sup> | 0.981 | 0.916 | 0.933 | 0.999 | NA | 0.995 | 0.955 | NA | 0.983 | 0.813 |
| HIP1R   | 7.2165 | 1.21×10 <sup>-4</sup> | 0.934 | 0.962 | 0.991 | 0.888 | NA | 0.898 | 0.988 | NA | 0.997 | 0.907 |
| SQLE    | 7.2069 | 1.23×10 <sup>-4</sup> | 0.982 | 0.939 | 0.965 | 0.977 | NA | 0.946 | 0.888 | NA | 0.916 | 0.948 |
| TECPR2  | 7.1999 | 1.24×10 <sup>-4</sup> | 0.937 | 0.999 | 0.959 | 0.896 | NA | 0.962 | 0.996 | NA | 0.972 | 0.846 |
| JAK1    | 7.1803 | 1.28×10 <sup>-4</sup> | 0.996 | 0.914 | 0.967 | 0.867 | NA | 0.943 | 0.959 | NA | 0.923 | 0.991 |
| ABCA7   | 7.1642 | 1.32×10 <sup>-4</sup> | 0.999 | 0.907 | 0.961 | 0.942 | NA | 0.987 | 0.981 | NA | 0.983 | 0.808 |
| ZNF10   | 7.1562 | 1.34×10 <sup>-4</sup> | 0.972 | 0.852 | 0.983 | 0.997 | NA | 0.978 | 0.961 | NA | 0.927 | 0.891 |
| VCPIP1  | 7.1521 | 1.35×10 <sup>-4</sup> | 0.875 | 0.967 | 0.984 | 0.970 | NA | 0.999 | 0.929 | NA | 0.894 | 0.938 |
| DAZL    | 7.1521 | 1.35×10 <sup>-4</sup> | 0.895 | 0.839 | 0.983 | 0.997 | NA | 0.990 | 0.973 | NA | 0.968 | 0.918 |
| CSRNP2  | 7.1146 | 1.44×10 <sup>-4</sup> | 0.960 | 0.718 | 0.987 | 0.981 | NA | 0.972 | 0.992 | NA | 0.983 | 0.990 |
| PINK1   | 7.1056 | 1.46×10 <sup>-4</sup> | 0.995 | 0.863 | 0.964 | 0.997 | NA | 0.976 | 0.999 | NA | 0.937 | 0.829 |
| OGDH    | 7.0967 | 1.48×10 <sup>-4</sup> | 0.963 | 0.959 | 0.966 | 0.962 | NA | 0.897 | 0.998 | NA | 0.928 | 0.876 |
| AKAP13  | 7.0885 | 1.50×10 <sup>-4</sup> | 0.977 | 0.945 | 0.924 | 0.932 | NA | 0.957 | 0.979 | NA | 0.858 | 0.974 |
| ACTR1A  | 7.0739 | 1.54×10 <sup>-4</sup> | 0.995 | 0.779 | 0.965 | 0.991 | NA | 0.969 | 0.981 | NA | 0.930 | 0.949 |
| RYBP    | 7.0349 | 1.65×10 <sup>-4</sup> | 0.980 | 0.791 | 0.934 | 0.963 | NA | 0.999 | 0.986 | NA | 0.981 | 0.918 |
| MYO5A   | 6.9725 | 1.84×10 <sup>-4</sup> | 0.973 | 0.866 | 0.863 | 0.969 | NA | 0.963 | 0.955 | NA | 0.958 | 0.987 |
| OSBP    | 6.9558 | 1.89×10 <sup>-4</sup> | 0.921 | 0.851 | 0.965 | 0.964 | NA | 0.951 | 0.990 | NA | 0.978 | 0.910 |
| LRPAP1  | 6.9544 | 1.89×10 <sup>-4</sup> | 0.996 | 0.991 | 1.000 | 0.991 | NA | 1.000 | 1.000 | NA | 0.988 | 0.633 |
| SQSTM1  | 6.9465 | 1.92×10 <sup>-4</sup> | 0.946 | 0.940 | 0.967 | 0.875 | NA | 0.902 | 0.953 | NA | 0.959 | 0.983 |
| CDKN2D  | 6.9405 | 1.94×10 <sup>-4</sup> | 0.935 | 0.963 | 0.955 | 0.928 | NA | 0.986 | 0.995 | NA | 0.941 | 0.827 |
| GTF2B   | 6.9359 | 1.95×10 <sup>-4</sup> | 0.792 | 0.923 | 0.989 | 0.955 | NA | 0.996 | 0.990 | NA | 0.925 | 0.968 |

|           |        |                       |       |       |       |       |    |       |       |    |       |       |
|-----------|--------|-----------------------|-------|-------|-------|-------|----|-------|-------|----|-------|-------|
| IER5      | 6.9308 | 1.97×10 <sup>-4</sup> | 0.968 | 0.966 | 0.995 | 0.870 | NA | 0.908 | 0.929 | NA | 0.955 | 0.934 |
| BTG2      | 6.8942 | 2.09×10 <sup>-4</sup> | 0.874 | 0.966 | 0.951 | 0.988 | NA | 0.846 | 0.956 | NA | 0.958 | 0.985 |
| TSC2      | 6.8819 | 2.14×10 <sup>-4</sup> | 0.907 | 0.846 | 0.963 | 0.956 | NA | 0.967 | 0.950 | NA | 0.953 | 0.977 |
| SUGP1     | 6.8356 | 2.31×10 <sup>-4</sup> | 0.929 | 0.998 | 0.999 | 0.975 | NA | 0.860 | 0.977 | NA | 0.796 | 0.995 |
| IZUMO4    | 6.8202 | 2.37×10 <sup>-4</sup> | 0.988 | 0.976 | 0.954 | 0.968 | NA | 0.998 | 0.995 | NA | 0.896 | 0.755 |
| PARD6B    | 6.8155 | 2.39×10 <sup>-4</sup> | 0.967 | 1.000 | 0.985 | 0.964 | NA | 0.986 | 0.702 | NA | 0.962 | 0.978 |
| CRK       | 6.8109 | 2.41×10 <sup>-4</sup> | 0.959 | 0.788 | 0.993 | 0.972 | NA | 0.982 | 0.899 | NA | 0.937 | 0.990 |
| CAP1      | 6.7961 | 2.47×10 <sup>-4</sup> | 0.958 | 0.993 | 0.937 | 0.757 | NA | 0.979 | 0.992 | NA | 0.940 | 0.968 |
| YPEL5     | 6.7867 | 2.51×10 <sup>-4</sup> | 0.982 | 0.856 | 0.836 | 0.988 | NA | 0.913 | 0.977 | NA | 0.966 | 0.994 |
| RIPK1     | 6.7405 | 2.72×10 <sup>-4</sup> | 0.983 | 0.772 | 0.932 | 0.979 | NA | 0.969 | 0.965 | NA | 0.960 | 0.951 |
| TMEM50A   | 6.7372 | 2.73×10 <sup>-4</sup> | 0.997 | 0.674 | 1.000 | 0.968 | NA | 1.000 | 0.999 | NA | 0.996 | 0.912 |
| NEU1      | 6.7350 | 2.75×10 <sup>-4</sup> | 0.993 | 0.920 | 0.993 | 0.977 | NA | 0.930 | 0.984 | NA | 0.847 | 0.859 |
| KLHDC2    | 6.7338 | 2.75×10 <sup>-4</sup> | 0.997 | 0.674 | 0.985 | 0.973 | NA | 1.000 | 0.947 | NA | 0.977 | 0.992 |
| HAGH      | 6.7209 | 2.81×10 <sup>-4</sup> | 0.992 | 0.942 | 0.999 | 0.814 | NA | 0.998 | 0.984 | NA | 0.864 | 0.915 |
| AP3D1     | 6.7150 | 2.84×10 <sup>-4</sup> | 0.954 | 0.967 | 0.968 | 0.789 | NA | 0.955 | 0.974 | NA | 0.951 | 0.944 |
| ULK1      | 6.7135 | 2.85×10 <sup>-4</sup> | 0.975 | 0.819 | 0.964 | 0.986 | NA | 0.983 | 0.999 | NA | 0.790 | 1.000 |
| FDFT1     | 6.6677 | 3.08×10 <sup>-4</sup> | 0.966 | 0.946 | 0.974 | 0.834 | NA | 0.993 | 0.860 | NA | 0.998 | 0.923 |
| STX12     | 6.6525 | 3.16×10 <sup>-4</sup> | 0.957 | 0.689 | 0.971 | 0.972 | NA | 0.970 | 0.997 | NA | 0.991 | 0.977 |
| HIST1H2BH | 6.6243 | 3.31×10 <sup>-4</sup> | 0.999 | 0.950 | 0.714 | 0.928 | NA | 0.950 | 0.991 | NA | 0.992 | 0.988 |
| CCDC92    | 6.5972 | 3.46×10 <sup>-4</sup> | 0.928 | 0.813 | 0.939 | 0.994 | NA | 0.996 | 0.989 | NA | 0.997 | 0.835 |
| OR11A1    | 6.5819 | 3.56×10 <sup>-4</sup> | 0.800 | 0.985 | 0.938 | 0.995 | NA | 0.924 | 0.902 | NA | 0.986 | 0.952 |
| GTF3C1    | 6.5727 | 3.61×10 <sup>-4</sup> | 0.964 | 0.999 | 0.991 | 0.947 | NA | 0.835 | 0.991 | NA | 0.854 | 0.901 |
| NAGK      | 6.5653 | 3.65×10 <sup>-4</sup> | 0.982 | 0.894 | 0.974 | 0.966 | NA | 0.973 | 0.973 | NA | 0.861 | 0.852 |

|         |        |                       |       |       |       |       |    |       |       |    |       |       |
|---------|--------|-----------------------|-------|-------|-------|-------|----|-------|-------|----|-------|-------|
| FBXO42  | 6.5575 | 3.70×10 <sup>-4</sup> | 0.979 | 0.955 | 0.896 | 0.993 | NA | 0.938 | 0.916 | NA | 0.895 | 0.895 |
| SERINC5 | 6.5359 | 3.84×10 <sup>-4</sup> | 0.966 | 0.969 | 0.877 | 0.944 | NA | 0.965 | 0.979 | NA | 0.966 | 0.808 |
| MYCBP2  | 6.5216 | 3.93×10 <sup>-4</sup> | 0.981 | 0.998 | 0.998 | 0.763 | NA | 0.910 | 1.000 | NA | 0.988 | 0.850 |
| CALCR   | 6.5137 | 3.99×10 <sup>-4</sup> | 0.879 | 0.906 | 0.941 | 0.955 | NA | 0.933 | 0.929 | NA | 0.983 | 0.934 |
| ATXN2   | 6.5017 | 4.07×10 <sup>-4</sup> | 0.977 | 0.802 | 0.949 | 0.947 | NA | 0.939 | 0.971 | NA | 0.947 | 0.934 |
| MAST3   | 6.4865 | 4.18×10 <sup>-4</sup> | 0.977 | 0.930 | 0.953 | 0.770 | NA | 0.990 | 0.978 | NA | 0.968 | 0.906 |
| KCTD13  | 6.4750 | 4.26×10 <sup>-4</sup> | 0.968 | 0.911 | 0.942 | 0.867 | NA | 0.999 | 0.898 | NA | 0.937 | 0.935 |
| SPSB3   | 6.4675 | 4.31×10 <sup>-4</sup> | 0.984 | 0.873 | 0.980 | 0.898 | NA | 0.818 | 0.932 | NA | 0.985 | 0.996 |
| SREBF2  | 6.4641 | 4.33×10 <sup>-4</sup> | 0.997 | 0.983 | 0.982 | 0.937 | NA | 0.850 | 0.810 | NA | 0.973 | 0.933 |
| ZBPB    | 6.4526 | 4.42×10 <sup>-4</sup> | 0.939 | 0.949 | 0.886 | 0.925 | NA | 0.927 | 0.968 | NA | 0.894 | 0.961 |
| CDKN1A  | 6.4099 | 4.76×10 <sup>-4</sup> | 0.999 | 0.989 | 0.979 | 0.885 | NA | 0.957 | 0.851 | NA | 0.993 | 0.808 |
| LSS     | 6.3819 | 4.98×10 <sup>-4</sup> | 0.982 | 0.942 | 0.980 | 0.986 | NA | 0.805 | 0.971 | NA | 0.963 | 0.827 |
| HERC1   | 6.3223 | 5.51×10 <sup>-4</sup> | 0.964 | 0.854 | 0.967 | 0.943 | NA | 0.969 | 0.953 | NA | 0.980 | 0.810 |
| ANKRD11 | 6.2930 | 5.78×10 <sup>-4</sup> | 0.950 | 0.954 | 0.929 | 0.887 | NA | 0.966 | 0.940 | NA | 0.934 | 0.866 |
| MARK3   | 6.2911 | 5.80×10 <sup>-4</sup> | 0.933 | 0.953 | 0.830 | 0.957 | NA | 0.974 | 0.992 | NA | 0.995 | 0.807 |
| FDPS    | 6.2839 | 5.87×10 <sup>-4</sup> | 0.974 | 0.947 | 0.972 | 0.976 | NA | 0.949 | 0.913 | NA | 0.867 | 0.831 |
| CDIPT   | 6.2669 | 6.04×10 <sup>-4</sup> | 0.947 | 0.971 | 0.978 | 0.895 | NA | 0.986 | 0.986 | NA | 0.972 | 0.716 |
| FAM49A  | 6.2656 | 6.05×10 <sup>-4</sup> | 0.929 | 0.857 | 0.944 | 0.926 | NA | 0.892 | 0.921 | NA | 0.994 | 0.958 |
| RHCE    | 6.2584 | 6.13×10 <sup>-4</sup> | 0.884 | 0.850 | 0.936 | 0.963 | NA | 0.918 | 0.995 | NA | 0.950 | 0.925 |
| IP6K2   | 6.2370 | 6.35×10 <sup>-4</sup> | 0.950 | 0.844 | 0.922 | 0.999 | NA | 0.951 | 0.968 | NA | 0.986 | 0.808 |
| NRBF2   | 6.2321 | 6.40×10 <sup>-4</sup> | 0.821 | 0.943 | 0.938 | 0.995 | NA | 0.980 | 0.885 | NA | 0.960 | 0.900 |
| USP9X   | 6.2266 | 6.46×10 <sup>-4</sup> | 0.983 | 0.742 | 0.991 | 0.989 | NA | 0.985 | 0.976 | NA | 0.925 | 0.851 |
| PLXNB3  | 6.2054 | 6.68×10 <sup>-4</sup> | 0.958 | 0.994 | 0.916 | 0.786 | NA | 0.930 | 0.985 | NA | 0.907 | 0.945 |

|                   |        |                       |       |       |       |       |    |       |       |    |       |       |
|-------------------|--------|-----------------------|-------|-------|-------|-------|----|-------|-------|----|-------|-------|
| C18orf8           | 6.1917 | 6.83×10 <sup>-4</sup> | 0.907 | 0.703 | 0.982 | 0.933 | NA | 0.974 | 0.976 | NA | 0.968 | 0.999 |
| BRD2              | 6.1910 | 6.84×10 <sup>-4</sup> | 0.935 | 0.957 | 0.909 | 0.974 | NA | 0.995 | 0.978 | NA | 0.922 | 0.755 |
| MSMO1             | 6.1654 | 7.14×10 <sup>-4</sup> | 0.995 | 0.936 | 0.987 | 0.983 | NA | 0.829 | 0.862 | NA | 0.852 | 0.970 |
| SLC31A2           | 6.1414 | 7.44×10 <sup>-4</sup> | 0.880 | 0.996 | 0.943 | 0.940 | NA | 0.869 | 0.969 | NA | 0.912 | 0.892 |
| UBN1              | 6.1200 | 7.71×10 <sup>-4</sup> | 0.829 | 0.880 | 0.978 | 0.903 | NA | 0.894 | 0.972 | NA | 0.985 | 0.961 |
| DKFZP586I14<br>20 | 6.1097 | 7.84×10 <sup>-4</sup> | 0.935 | 0.942 | 0.962 | 0.941 | NA | 0.915 | 0.889 | NA | 0.862 | 0.945 |
| NXPH4             | 6.1038 | 7.92×10 <sup>-4</sup> | 0.930 | 0.885 | 0.870 | 0.912 | NA | 0.972 | 0.882 | NA | 0.950 | 0.993 |
| ABCD1             | 6.0986 | 7.99×10 <sup>-4</sup> | 0.879 | 0.997 | 0.960 | 0.843 | NA | 0.984 | 0.858 | NA | 0.934 | 0.943 |
| PPIEL             | 6.0850 | 8.18×10 <sup>-4</sup> | 0.761 | 0.962 | 0.872 | 0.998 | NA | 0.942 | 0.964 | NA | 0.976 | 0.931 |
| AKIRIN1           | 6.0846 | 8.18×10 <sup>-4</sup> | 0.985 | 0.920 | 0.977 | 0.856 | NA | 0.940 | 0.997 | NA | 0.890 | 0.831 |
| GADD45A           | 6.0728 | 8.34×10 <sup>-4</sup> | 0.949 | 0.919 | 0.689 | 0.964 | NA | 0.935 | 0.996 | NA | 0.997 | 0.974 |
| PIAS1             | 6.0612 | 8.50×10 <sup>-4</sup> | 0.983 | 0.637 | 0.915 | 0.993 | NA | 0.984 | 0.999 | NA | 0.995 | 0.940 |
| SOX3              | 6.0452 | 8.73×10 <sup>-4</sup> | 0.969 | 0.998 | 0.957 | 0.960 | NA | 0.995 | 0.673 | NA | 0.891 | 0.984 |
| DUSP14            | 6.0321 | 8.93×10 <sup>-4</sup> | 0.986 | 0.920 | 0.955 | 0.969 | NA | 0.997 | 0.959 | NA | 0.775 | 0.835 |
| BMPR2             | 6.0243 | 9.04×10 <sup>-4</sup> | 0.977 | 0.979 | 0.954 | 0.709 | NA | 0.965 | 0.971 | NA | 0.879 | 0.975 |
| RB1CC1            | 6.0216 | 9.08×10 <sup>-4</sup> | 0.896 | 0.847 | 0.935 | 0.904 | NA | 0.988 | 0.931 | NA | 0.943 | 0.933 |
| ATP6V0A1          | 5.9755 | 9.78×10 <sup>-4</sup> | 0.982 | 0.908 | 0.988 | 0.931 | NA | 0.996 | 0.937 | NA | 0.961 | 0.699 |
| NCALD             | 5.9728 | 9.83×10 <sup>-4</sup> | 0.876 | 0.888 | 0.930 | 0.936 | NA | 0.983 | 0.989 | NA | 0.957 | 0.814 |

**Table S7. All sequences of primer used for qRT-PCR**

| Gene  | Forward Primer                  | Reverse Primer                    |
|-------|---------------------------------|-----------------------------------|
| MCM2  | GCC AAG ATG TAC AGT GAC CTG A   | GAT GTG CCG CAC CGT AAT           |
| MCM10 | GCA TGA TGG TGT GAA GAG GTT     | TCC CAT TTG TAG AGG CCA CAG       |
| GAP43 | TCC GTG GAC ACA TAA CAA GG      | CAG TAG TGG TGC CTT CTC C         |
| CRT   | AAG TTC TAC GGT GAC GAG GAG     | GTC GAT GTT CTG CTC ATG TTT C     |
| NSE2  | TGT CTG CTG CTC AAG GTC AA      | CGA TGA CTC ACC ATG ACC C         |
| NEFH  | TGA ACA CAG ACG CTA TGC GCT CAG | CAC CTT TAT GTG AGT GGA CAC AGA G |
| GAPDH | ACA CCC ACT CCT CCA CCT TTG     | GCT GTA GCC AAA TTC GTT GTC ATA C |
